# Supplementary material for: Artificial intelligence enabled parabolic response surface platform identifies ultra-rapid near-universal TB drug treatment regimens comprising approved drugs
Source: PubMed Central journal article supplement (PMC6510528; doi:10.1371/journal.pone.0215607), 2019-05-10
Supplement: pone.0215607.s001.pdf [file pone.0215607.s001.pdf]

**S1 Table. Drug concentrations used in macrophage infection model of *M. tuberculosis*.**

| Drug <sup>a</sup> | Screening test<br>10% level <sup>b</sup> | Iteration 1<br>10% level | Iteration 2<br>15% level | Iteration 3A<br>20% level | Iteration 3B<br>20% level | Iteration 3C<br>15% level |
|-------------------|------------------------------------------|--------------------------|--------------------------|---------------------------|---------------------------|---------------------------|
| AC                | 4.00                                     | 3.60                     | 3.00                     | 3.62                      | 3.62                      | 5.34                      |
| CFZ               | 0.025                                    | 0.05                     | 0.127                    | 0.14                      | 0.14                      | 0.051                     |
| CYC               | 5.00                                     |                          |                          |                           |                           |                           |
| EMB               | 0.05                                     | 0.075                    | 0.20                     | 0.22                      | 0.22                      | 0.20                      |
| INH               | 0.006                                    | 0.012                    | 0.020                    | 0.023                     | 0.023                     | 0.023                     |
| LZD               | 0.02                                     |                          |                          |                           |                           |                           |
| MXF               | 0.02                                     |                          |                          |                           |                           |                           |
| PA824             | 0.00132                                  | 0.0025                   | 0.0032                   | 0.00368                   |                           | 0.00261                   |
| PAS               | 0.05                                     | 0.10                     |                          |                           |                           |                           |
| PRO               | 0.0133                                   | 0.02                     |                          |                           |                           |                           |
| PZA               | 17.00                                    | 17.00                    | 22.00                    | 24.50                     | 24.50                     | 20.70                     |
| RIF               | 0.005                                    | 0.0065                   | 0.016                    | 0.0176                    | 0.0176                    | 0.00929                   |
| SQ109             | 0.066                                    | 0.16                     | 0.217                    |                           | 0.24                      | 0.19254                   |
| BDQ               | 0.0066                                   | 0.008                    | 0.007                    | 0.00884                   | 0.00884                   | 0.01076                   |
| DLM               | 0.0006                                   | 0.0008                   | 0.001                    | 0.00117                   | 0.00117                   | 0.00134                   |

<sup>a</sup>All drug concentrations shown are in µg/ml.

<sup>b</sup>Shown are concentration of individual drugs used in the screening test or iterations to give the indicated percentage of inhibition of the maximal IPTG-induced green fluorescence level in the macrophage infection model of Mtb-iGFP.
