# Supplementary material for: Artificial intelligence enabled parabolic response surface platform identifies ultra-rapid near-universal TB drug treatment regimens comprising approved drugs
Source: PubMed Central journal article supplement (PMC6510528; doi:10.1371/journal.pone.0215607), 2019-05-10
Supplement: pone.0215607.s002.pdf [file pone.0215607.s002.pdf]

**S2 Table. Screening test two-level orthogonal array experimental design and experimental results.**

| Run/Drug                                               |    |     |     |     |     |     |     |       |     |     |     |     |       |     |     | % Inhibition |    |      |
|--------------------------------------------------------|----|-----|-----|-----|-----|-----|-----|-------|-----|-----|-----|-----|-------|-----|-----|--------------|----|------|
|                                                        | AC | CFZ | CYC | EMB | INH | LZD | MXF | PA824 | PAS | PRO | PZA | RIF | SQ109 | BDQ | DLM | Mean         | N  | SE   |
| Control 1 (no infection control)                       |    |     |     |     |     |     |     |       |     |     |     |     |       |     |     | 97%          | 18 | 0.3% |
| Control 2 (no IPTG control)                            |    |     |     |     |     |     |     |       |     |     |     |     |       |     |     | 93%          | 18 | 0.5% |
| Control 3 (no drug control)                            |    |     |     |     |     |     |     |       |     |     |     |     |       |     |     | -1%          | 18 | 5.4% |
| Control 4 (all drug control, at 10% drug effect level) |    |     |     |     |     |     |     |       |     |     |     |     |       |     |     | 61%          | 9  | 1.6% |
| 1                                                      | 2  | 2   | 2   | 1   | 2   | 2   | 2   | 2     | 1   | 1   | 1   | 1   | 1     | 1   | 1   | 25%          | 3  | 3.6% |
| 2                                                      | 2  | 1   | 1   | 1   | 1   | 1   | 2   | 2     | 1   | 2   | 2   | 2   | 2     | 1   | 1   | 31%          | 3  | 2.2% |
| 3                                                      | 1  | 1   | 2   | 1   | 2   | 1   | 1   | 2     | 2   | 2   | 1   | 1   | 2     | 2   | 1   | 28%          | 3  | 1.5% |
| 4                                                      | 2  | 2   | 2   | 2   | 2   | 2   | 2   | 2     | 2   | 2   | 2   | 2   | 2     | 2   | 2   | 56%          | 3  | 3.4% |
| 5                                                      | 1  | 2   | 1   | 2   | 1   | 2   | 1   | 2     | 1   | 2   | 1   | 1   | 2     | 1   | 2   | 58%          | 3  | 1.4% |
| 6                                                      | 1  | 2   | 2   | 2   | 1   | 1   | 2   | 1     | 1   | 2   | 1   | 2   | 1     | 2   | 1   | 38%          | 3  | 3.0% |
| 7                                                      | 1  | 2   | 2   | 1   | 1   | 1   | 2   | 1     | 2   | 1   | 2   | 1   | 2     | 1   | 2   | 10%          | 3  | 3.4% |
| 8                                                      | 1  | 1   | 1   | 1   | 2   | 2   | 2   | 1     | 2   | 2   | 1   | 2   | 1     | 1   | 2   | 17%          | 3  | 3.6% |
| 9                                                      | 2  | 1   | 2   | 1   | 1   | 2   | 1   | 1     | 1   | 2   | 2   | 1   | 1     | 2   | 2   | 29%          | 3  | 8.4% |
| 10                                                     | 1  | 2   | 1   | 1   | 1   | 2   | 1   | 2     | 2   | 1   | 2   | 2   | 1     | 2   | 1   | 28%          | 3  | 5.1% |
| 11                                                     | 2  | 1   | 2   | 2   | 1   | 2   | 1   | 1     | 2   | 1   | 1   | 2   | 2     | 1   | 1   | 48%          | 3  | 2.1% |
| 12                                                     | 2  | 2   | 1   | 1   | 2   | 1   | 1   | 1     | 1   | 1   | 1   | 2   | 2     | 2   | 2   | 32%          | 3  | 5.7% |
| 13                                                     | 2  | 2   | 1   | 2   | 2   | 1   | 1   | 1     | 2   | 2   | 2   | 1   | 1     | 1   | 1   | 57%          | 3  | 1.7% |
| 14                                                     | 1  | 1   | 2   | 2   | 2   | 1   | 1   | 2     | 1   | 1   | 2   | 2   | 1     | 1   | 2   | 51%          | 3  | 3.3% |
| 15                                                     | 2  | 1   | 1   | 2   | 1   | 1   | 2   | 2     | 2   | 1   | 1   | 1   | 1     | 2   | 2   | 59%          | 3  | 3.0% |
| 16                                                     | 1  | 1   | 1   | 2   | 2   | 2   | 2   | 1     | 1   | 1   | 2   | 1   | 2     | 2   | 1   | 43%          | 3  | 4.5% |
| 17                                                     | 1  | 2   | 2   | 2   | 1   | 2   | 2   | 2     | 1   | 1   | 2   | 2   | 2     | 1   | 1   | 26%          | 3  | 2.3% |
| 18                                                     | 1  | 2   | 1   | 1   | 1   | 1   | 1   | 1     | 2   | 2   | 1   | 2   | 2     | 1   | 1   | 3%           | 3  | 5.1% |
| 19                                                     | 2  | 2   | 1   | 1   | 2   | 2   | 1   | 2     | 1   | 2   | 2   | 2   | 1     | 1   | 2   | 62%          | 3  | 0.7% |
| 20                                                     | 2  | 2   | 2   | 2   | 2   | 1   | 2   | 1     | 2   | 1   | 1   | 2   | 1     | 1   | 2   | 55%          | 3  | 0.9% |
| 21                                                     | 2  | 1   | 1   | 1   | 1   | 2   | 2   | 1     | 1   | 1   | 1   | 2   | 1     | 2   | 1   | 42%          | 3  | 2.5% |
| 22                                                     | 2  | 2   | 1   | 2   | 2   | 2   | 1   | 2     | 2   | 1   | 1   | 1   | 2     | 2   | 1   | 57%          | 3  | 1.5% |
| 23                                                     | 1  | 1   | 1   | 1   | 2   | 1   | 2   | 2     | 2   | 1   | 2   | 2   | 2     | 2   | 2   | 46%          | 3  | 1.4% |
| 24                                                     | 1  | 1   | 2   | 2   | 2   | 2   | 1   | 1     | 1   | 2   | 1   | 2   | 2     | 2   | 2   | 49%          | 3  | 2.1% |
| 25                                                     | 2  | 1   | 2   | 1   | 1   | 1   | 1   | 2     | 1   | 1   | 1   | 1   | 2     | 1   | 2   | 41%          | 3  | 1.0% |
| 26                                                     | 1  | 2   | 2   | 1   | 1   | 2   | 2   | 2     | 2   | 2   | 1   | 1   | 1     | 2   | 2   | 25%          | 3  | 6.0% |
| 27                                                     | 1  | 1   | 1   | 2   | 2   | 1   | 2   | 2     | 1   | 2   | 1   | 1   | 1     | 1   | 1   | 28%          | 3  | 3.7% |
| 28                                                     | 2  | 1   | 2   | 2   | 1   | 1   | 1   | 2     | 2   | 2   | 2   | 2   | 1     | 2   | 1   | 53%          | 3  | 3.2% |
| 29                                                     | 1  | 1   | 2   | 1   | 2   | 2   | 1   | 1     | 2   | 1   | 2   | 1   | 1     | 1   | 1   | -2%          | 3  | 6.6% |
| 30                                                     | 2  | 1   | 1   | 2   | 1   | 2   | 2   | 1     | 2   | 2   | 2   | 1   | 2     | 1   | 2   | 33%          | 3  | 3.9% |
| 31                                                     | 1  | 2   | 1   | 2   | 1   | 1   | 1   | 1     | 1   | 1   | 2   | 1   | 1     | 2   | 2   | 52%          | 3  | 2.0% |
| 32                                                     | 2  | 2   | 2   | 1   | 2   | 1   | 2   | 1     | 1   | 2   | 2   | 1   | 2     | 2   | 1   | 35%          | 3  | 1.7% |
| 33                                                     | 1  | 1   | 1   | 2   | 1   | 2   | 1   | 1     | 1   | 2   | 2   | 2   | 1     | 1   | 1   | 36%          | 3  | 4.3% |
| 34                                                     | 2  | 2   | 2   | 2   | 1   | 2   | 1   | 2     | 2   | 1   | 2   | 1   | 1     | 1   | 2   | 52%          | 3  | 2.5% |
| 35                                                     | 1  | 2   | 1   | 1   | 2   | 2   | 2   | 2     | 2   | 2   | 2   | 1   | 2     | 1   | 1   | 29%          | 3  | 2.1% |
| 36                                                     | 1  | 2   | 2   | 1   | 2   | 1   | 1   | 1     | 2   | 2   | 2   | 2   | 1     | 2   | 2   | 27%          | 3  | 1.0% |
| 37                                                     | 1  | 1   | 1   | 1   | 1   | 2   | 1   | 1     | 2   | 1   | 1   | 1   | 2     | 2   | 2   | 23%          | 3  | 2.4% |
| 38                                                     | 2  | 1   | 1   | 2   | 2   | 1   | 1   | 2     | 2   | 2   | 1   | 2   | 2     | 1   | 2   | 72%          | 3  | 0.7% |
| 39                                                     | 1  | 2   | 1   | 2   | 2   | 2   | 2   | 2     | 1   | 1   | 1   | 2   | 1     | 2   | 2   | 70%          | 3  | 1.6% |
| 40                                                     | 1  | 1   | 2   | 2   | 1   | 1   | 2   | 2     | 1   | 2   | 2   | 1   | 2     | 2   | 2   | 43%          | 3  | 2.2% |
| 41                                                     | 2  | 2   | 2   | 1   | 1   | 2   | 1   | 2     | 1   | 2   | 1   | 2   | 2     | 2   | 1   | 26%          | 3  | 4.8% |
| 42                                                     | 2  | 1   | 2   | 1   | 2   | 2   | 2   | 1     | 1   | 1   | 2   | 2   | 2     | 1   | 2   | 49%          | 3  | 2.3% |
| 43                                                     | 1  | 1   | 2   | 1   | 1   | 1   | 2   | 2     | 2   | 1   | 1   | 2   | 1     | 1   | 1   | 13%          | 3  | 1.8% |
| 44                                                     | 2  | 2   | 1   | 1   | 1   | 1   | 2   | 1     | 1   | 2   | 1   | 1   | 1     | 1   | 2   | 40%          | 3  | 3.0% |
| 45                                                     | 2  | 1   | 1   | 1   | 2   | 1   | 1   | 2     | 1   | 1   | 2   | 1   | 1     | 2   | 1   | 43%          | 3  | 4.7% |
| 46                                                     | 1  | 2   | 2   | 2   | 2   | 1   | 1   | 1     | 1   | 1   | 1   | 1   | 2     | 1   | 1   | 12%          | 3  | 2.8% |
| 47                                                     | 2  | 2   | 1   | 2   | 1   | 1   | 2   | 1     | 2   | 1   | 2   | 2   | 2     | 2   | 1   | 56%          | 3  | 1.8% |
| 48                                                     | 2  | 1   | 2   | 2   | 2   | 2   | 2   | 1     | 2   | 2   | 1   | 1   | 1     | 2   | 1   | 20%          | 3  | 9.3% |
| 49                                                     | 1  | 2   | 1   | 2   | 2   | 2   | 1   | 1     | 2   | 1   | 2   | 2   | 2     | 1   | 2   | 59%          | 3  | 1.8% |
| 50                                                     | 2  | 1   | 1   | 1   | 2   | 1   | 2   | 1     | 2   | 1   | 1   | 1   | 2     | 1   | 1   | 6%           | 3  | 4.8% |
| 51                                                     | 2  | 2   | 2   | 2   | 1   | 2   | 2   | 1     | 1   | 1   | 1   | 1   | 2     | 2   | 2   | 57%          | 3  | 0.7% |
| 52                                                     | 2  | 1   | 2   | 2   | 2   | 2   | 1   | 2     | 1   | 2   | 2   | 1   | 2     | 1   | 1   | 30%          | 3  | 3.2% |
| 53                                                     | 1  | 1   | 1   | 1   | 1   | 2   | 2   | 2     | 1   | 1   | 2   | 1   | 1     | 1   | 2   | 15%          | 3  | 3.9% |
| 54                                                     | 1  | 2   | 1   | 1   | 2   | 2   | 1   | 1     | 1   | 2   | 1   | 1   | 1     | 2   | 1   | 34%          | 3  | 0.9% |
| 55                                                     | 2  | 1   | 1   | 2   | 2   | 1   | 2   | 1     | 1   | 2   | 2   | 1   | 2     | 2   | 2   | 75%          | 3  | 1.7% |
| 56                                                     | 1  | 2   | 2   | 1   | 2   | 1   | 2   | 2     | 1   | 2   | 1   | 2   | 2     | 1   | 2   | 25%          | 3  | 1.4% |
| 57                                                     | 2  | 2   | 1   | 2   | 1   | 1   | 1   | 2     | 1   | 1   | 1   | 2   | 1     | 1   | 1   | 61%          | 3  | 3.3% |
| 58                                                     | 1  | 2   | 2   | 2   | 2   | 1   | 2   | 2     | 2   | 1   | 2   | 1   | 1     | 2   | 1   | 40%          | 3  | 3.8% |
| 59                                                     | 2  | 2   | 2   | 1   | 1   | 2   | 2   | 1     | 2   | 2   | 2   | 2   | 1     | 1   | 1   | 20%          | 3  | 2.2% |
| 60                                                     | 1  | 1   | 2   | 2   | 1   | 1   | 1   | 1     | 2   | 2   | 1   | 1   | 1     | 1   | 2   | 27%          | 3  | 1.7% |
| 61                                                     | 1  | 1   | 2   | 1   | 1   | 1   | 1   | 1     | 1   | 1   | 2   | 2   | 2     | 2   | 1   | 4%           | 3  | 5.2% |
| 62                                                     | 1  | 1   | 1   | 2   | 1   | 2   | 2   | 2     | 2   | 2   | 1   | 2   | 2     | 2   | 1   | 57%          | 3  | 0.4% |
| 63                                                     | 2  | 1   | 2   | 1   | 2   | 2   | 1   | 2     | 2   | 1   | 1   | 2   | 1     | 2   | 2   | 49%          | 3  | 1.7% |
| 64                                                     | 2  | 2   | 1   | 1   | 1   | 1   | 1   | 2     | 2   | 2   | 2   | 1   | 2     | 2   | 2   | 62%          | 3  | 2.1% |
| 65                                                     | 1  | 1   | 1   | 1   | 2   | 2   | 1   | 2     | 1   | 1   | 1   | 2   | 2     | 1   | 1   | 13%          | 3  | 3.4% |

|     |   |   |   |   |   |   |   |   |   |   |   |   |   |   |   |      |     |       |      |
|-----|---|---|---|---|---|---|---|---|---|---|---|---|---|---|---|------|-----|-------|------|
| 66  | 2 | 1 | 2 | 1 | 1 | 2 | 2 | 2 | 2 | 2 | 1 | 2 | 1 | 2 | 2 | 1    | 39% | 3     | 3.3% |
| 67  | 1 | 2 | 1 | 1 | 1 | 2 | 2 | 1 | 1 | 2 | 2 | 2 | 2 | 2 | 2 | 2    | 47% | 3     | 1.1% |
| 68  | 2 | 2 | 2 | 1 | 2 | 2 | 1 | 1 | 2 | 2 | 1 | 1 | 2 | 1 | 2 | 31%  | 3   | 5.9%  |      |
| 69  | 2 | 1 | 1 | 1 | 1 | 1 | 1 | 1 | 2 | 1 | 2 | 2 | 1 | 1 | 2 | 48%  | 3   | 1.8%  |      |
| 70  | 1 | 1 | 2 | 1 | 2 | 1 | 2 | 1 | 1 | 1 | 1 | 1 | 1 | 2 | 2 | 14%  | 3   | 9.5%  |      |
| 71  | 1 | 2 | 1 | 2 | 1 | 2 | 2 | 1 | 2 | 1 | 1 | 1 | 1 | 1 | 1 | 33%  | 3   | 3.2%  |      |
| 72  | 2 | 2 | 1 | 1 | 2 | 1 | 2 | 2 | 2 | 2 | 1 | 2 | 1 | 2 | 1 | 32%  | 3   | 2.3%  |      |
| 73  | 1 | 1 | 1 | 2 | 2 | 2 | 1 | 2 | 2 | 2 | 2 | 1 | 1 | 2 | 2 | 59%  | 3   | 1.2%  |      |
| 74  | 2 | 2 | 1 | 2 | 2 | 1 | 2 | 2 | 1 | 1 | 2 | 1 | 2 | 1 | 2 | 70%  | 3   | 2.2%  |      |
| 75  | 1 | 2 | 2 | 1 | 1 | 1 | 1 | 2 | 1 | 2 | 2 | 1 | 1 | 1 | 1 | 12%  | 3   | 5.2%  |      |
| 76  | 2 | 1 | 1 | 2 | 1 | 1 | 1 | 1 | 1 | 2 | 1 | 1 | 2 | 2 | 1 | 39%  | 3   | 1.3%  |      |
| 77  | 1 | 1 | 2 | 2 | 2 | 1 | 2 | 1 | 2 | 2 | 2 | 2 | 2 | 1 | 1 | 32%  | 3   | 3.6%  |      |
| 78  | 1 | 2 | 2 | 2 | 1 | 1 | 1 | 2 | 2 | 1 | 1 | 2 | 2 | 2 | 2 | 61%  | 3   | 1.4%  |      |
| 79  | 2 | 2 | 2 | 2 | 2 | 2 | 1 | 1 | 1 | 1 | 2 | 2 | 1 | 2 | 1 | 51%  | 3   | 2.9%  |      |
| 80  | 2 | 1 | 2 | 2 | 1 | 2 | 2 | 2 | 1 | 2 | 1 | 2 | 1 | 1 | 2 | 75%  | 3   | 1.0%  |      |
| 81  | 2 | 1 | 1 | 2 | 2 | 2 | 2 | 2 | 2 | 1 | 2 | 2 | 1 | 1 | 1 | 63%  | 3   | 1.4%  |      |
| 82  | 1 | 2 | 1 | 2 | 2 | 1 | 1 | 2 | 1 | 2 | 2 | 2 | 2 | 2 | 1 | 49%  | 3   | 3.3%  |      |
| 83  | 1 | 1 | 1 | 2 | 1 | 1 | 2 | 1 | 1 | 1 | 1 | 2 | 2 | 1 | 2 | 63%  | 3   | 1.0%  |      |
| 84  | 2 | 2 | 2 | 2 | 1 | 1 | 2 | 2 | 2 | 2 | 1 | 1 | 2 | 1 | 1 | 44%  | 3   | 5.1%  |      |
| 85  | 2 | 1 | 1 | 1 | 2 | 2 | 2 | 2 | 1 | 2 | 1 | 1 | 2 | 2 | 2 | 60%  | 3   | 1.4%  |      |
| 86  | 1 | 2 | 2 | 1 | 2 | 2 | 2 | 1 | 2 | 1 | 1 | 2 | 2 | 2 | 1 | 11%  | 3   | 2.3%  |      |
| 87  | 2 | 1 | 2 | 1 | 2 | 1 | 1 | 1 | 1 | 2 | 1 | 2 | 1 | 1 | 1 | 32%  | 3   | 1.3%  |      |
| 88  | 2 | 1 | 2 | 2 | 2 | 1 | 1 | 1 | 2 | 1 | 2 | 1 | 2 | 2 | 2 | 45%  | 3   | 4.5%  |      |
| 89  | 2 | 2 | 1 | 2 | 1 | 2 | 1 | 1 | 2 | 2 | 1 | 2 | 1 | 2 | 2 | 63%  | 3   | 3.3%  |      |
| 90  | 1 | 1 | 2 | 1 | 1 | 2 | 1 | 2 | 2 | 2 | 2 | 2 | 2 | 1 | 2 | 49%  | 3   | 0.9%  |      |
| 91  | 2 | 2 | 1 | 1 | 1 | 2 | 1 | 1 | 1 | 1 | 2 | 1 | 2 | 1 | 1 | 40%  | 3   | 2.3%  |      |
| 92  | 1 | 2 | 1 | 1 | 2 | 1 | 1 | 2 | 2 | 1 | 1 | 1 | 1 | 1 | 2 | 39%  | 3   | 1.1%  |      |
| 93  | 1 | 1 | 1 | 1 | 1 | 1 | 2 | 1 | 2 | 2 | 2 | 1 | 1 | 2 | 1 | 16%  | 3   | 12.0% |      |
| 94  | 2 | 2 | 2 | 1 | 1 | 1 | 2 | 2 | 1 | 1 | 2 | 2 | 1 | 2 | 2 | 40%  | 3   | 1.0%  |      |
| 95  | 1 | 1 | 2 | 2 | 1 | 2 | 1 | 2 | 1 | 1 | 1 | 1 | 1 | 2 | 1 | 41%  | 3   | 1.0%  |      |
| 96  | 1 | 2 | 2 | 2 | 2 | 2 | 2 | 1 | 1 | 2 | 2 | 1 | 1 | 1 | 2 | 34%  | 3   | 4.7%  |      |
| 97  | 1 | 2 | 1 | 1 | 1 | 1 | 2 | 2 | 1 | 1 | 1 | 1 | 2 | 2 | 1 | 27%  | 3   | 4.0%  |      |
| 98  | 2 | 2 | 1 | 2 | 2 | 2 | 2 | 1 | 1 | 2 | 1 | 2 | 2 | 1 | 1 | 45%  | 3   | 0.3%  |      |
| 99  | 1 | 1 | 2 | 2 | 2 | 2 | 2 | 2 | 2 | 1 | 1 | 1 | 2 | 1 | 2 | 41%  | 3   | 3.1%  |      |
| 100 | 2 | 2 | 1 | 1 | 2 | 2 | 2 | 1 | 2 | 1 | 2 | 1 | 1 | 2 | 2 | 58%  | 3   | 1.4%  |      |
| 101 | 2 | 1 | 1 | 2 | 1 | 2 | 1 | 2 | 1 | 1 | 2 | 2 | 2 | 2 | 2 | 80%  | 3   | 1.0%  |      |
| 102 | 1 | 2 | 2 | 1 | 1 | 2 | 1 | 1 | 1 | 1 | 1 | 2 | 1 | 1 | 2 | 3%   | 3   | 2.0%  |      |
| 103 | 2 | 1 | 2 | 2 | 1 | 1 | 2 | 1 | 1 | 1 | 2 | 1 | 1 | 1 | 1 | 39%  | 3   | 3.2%  |      |
| 104 | 1 | 1 | 1 | 2 | 2 | 1 | 1 | 1 | 2 | 1 | 1 | 2 | 1 | 2 | 1 | 50%  | 3   | 2.0%  |      |
| 105 | 2 | 1 | 2 | 1 | 1 | 1 | 2 | 1 | 2 | 2 | 1 | 2 | 2 | 2 | 2 | 41%  | 3   | 4.0%  |      |
| 106 | 2 | 1 | 1 | 1 | 1 | 2 | 1 | 2 | 2 | 2 | 1 | 1 | 1 | 1 | 1 | 30%  | 3   | 3.2%  |      |
| 107 | 2 | 2 | 2 | 2 | 2 | 1 | 1 | 2 | 1 | 2 | 1 | 1 | 1 | 2 | 2 | 58%  | 3   | 0.3%  |      |
| 108 | 1 | 2 | 2 | 2 | 1 | 2 | 1 | 1 | 2 | 2 | 2 | 1 | 2 | 2 | 1 | 46%  | 3   | 2.7%  |      |
| 109 | 1 | 1 | 1 | 1 | 2 | 1 | 1 | 1 | 1 | 2 | 2 | 1 | 2 | 1 | 2 | 21%  | 3   | 2.3%  |      |
| 110 | 1 | 2 | 1 | 2 | 1 | 1 | 2 | 2 | 2 | 2 | 2 | 2 | 1 | 1 | 2 | 69%  | 3   | 1.1%  |      |
| 111 | 1 | 1 | 2 | 1 | 2 | 2 | 2 | 2 | 1 | 2 | 2 | 2 | 1 | 2 | 1 | 4%   | 3   | 9.8%  |      |
| 112 | 2 | 2 | 2 | 1 | 2 | 1 | 1 | 2 | 2 | 1 | 2 | 2 | 2 | 1 | 1 | 27%  | 3   | 3.1%  |      |
| 113 | 2 | 2 | 2 | 1 | 1 | 1 | 1 | 1 | 2 | 1 | 1 | 1 | 1 | 2 | 1 | 33%  | 3   | 4.0%  |      |
| 114 | 1 | 1 | 1 | 1 | 1 | 1 | 1 | 2 | 1 | 2 | 1 | 2 | 1 | 2 | 2 | 52%  | 3   | 3.3%  |      |
| 115 | 2 | 1 | 2 | 2 | 2 | 1 | 2 | 2 | 1 | 1 | 1 | 2 | 2 | 2 | 1 | 57%  | 3   | 1.3%  |      |
| 116 | 1 | 1 | 1 | 2 | 1 | 1 | 1 | 2 | 2 | 1 | 2 | 1 | 2 | 1 | 1 | 29%  | 3   | 4.7%  |      |
| 117 | 2 | 2 | 2 | 2 | 1 | 1 | 1 | 1 | 1 | 2 | 2 | 2 | 2 | 1 | 2 | 45%  | 3   | 2.9%  |      |
| 118 | 1 | 1 | 2 | 2 | 1 | 2 | 2 | 1 | 2 | 1 | 2 | 2 | 1 | 2 | 2 | 48%  | 3   | 3.2%  |      |
| 119 | 1 | 2 | 1 | 1 | 2 | 1 | 2 | 1 | 1 | 1 | 2 | 2 | 1 | 1 | 1 | 6%   | 3   | 3.2%  |      |
| 120 | 1 | 2 | 1 | 2 | 2 | 1 | 2 | 2 | 1 | 2 | 2 | 1 | 1 | 2 | 2 | 52%  | 3   | 5.1%  |      |
| 121 | 1 | 2 | 2 | 2 | 2 | 2 | 1 | 2 | 2 | 2 | 1 | 2 | 1 | 1 | 1 | 33%  | 3   | 1.6%  |      |
| 122 | 2 | 1 | 1 | 1 | 2 | 2 | 1 | 1 | 2 | 2 | 2 | 2 | 2 | 2 | 1 | 47%  | 3   | 3.3%  |      |
| 123 | 1 | 2 | 2 | 1 | 2 | 2 | 1 | 2 | 1 | 1 | 2 | 1 | 2 | 2 | 2 | 40%  | 3   | 3.9%  |      |
| 124 | 1 | 1 | 2 | 1 | 1 | 2 | 2 | 1 | 1 | 2 | 1 | 1 | 2 | 1 | 1 | -13% | 3   | 2.7%  |      |
| 125 | 2 | 2 | 1 | 1 | 1 | 2 | 2 | 2 | 2 | 1 | 1 | 2 | 2 | 1 | 2 | 54%  | 3   | 2.6%  |      |
| 126 | 2 | 1 | 2 | 1 | 2 | 1 | 2 | 2 | 2 | 2 | 2 | 1 | 1 | 1 | 2 | 31%  | 3   | 2.1%  |      |
| 127 | 2 | 1 | 1 | 2 | 2 | 2 | 1 | 1 | 1 | 1 | 1 | 1 | 1 | 1 | 2 | 58%  | 3   | 1.9%  |      |
| 128 | 2 | 2 | 1 | 2 | 1 | 2 | 2 | 2 | 1 | 2 | 2 | 1 | 1 | 2 | 1 | 60%  | 3   | 0.7%  |      |
| 129 | 1 | 1 | 2 | 2 | 1 | 1 | 2 | 1 | 2 | 1 | 2 | 1 | 1 | 2 | 1 | 31%  | 3   | 0.6%  |      |
| 130 | 1 | 1 | 1 | 1 | 1 | 1 | 2 | 1 | 1 | 2 | 2 | 2 | 2 | 2 | 1 | 25%  | 3   | 1.1%  |      |
| 131 | 1 | 1 | 1 | 1 | 1 | 1 | 1 | 1 | 2 | 2 | 2 | 1 | 2 | 1 | 1 | 21%  | 3   | 2.7%  |      |
| 132 | 1 | 1 | 1 | 2 | 2 | 1 | 1 | 2 | 2 | 2 | 2 | 1 | 2 | 2 | 1 | 47%  | 3   | 1.7%  |      |
| 133 | 1 | 2 | 1 | 2 | 1 | 2 | 1 | 1 | 2 | 2 | 1 | 2 | 1 | 1 | 1 | 48%  | 3   | 2.0%  |      |
| 134 | 1 | 1 | 1 | 1 | 1 | 1 | 2 | 2 | 1 | 1 | 1 | 1 | 2 | 1 | 2 | 19%  | 3   | 9.7%  |      |
| 135 | 1 | 1 | 2 | 2 | 2 | 1 | 2 | 1 | 2 | 1 | 2 | 1 | 2 | 2 | 2 | 39%  | 3   | 4.8%  |      |
| 136 | 2 | 2 | 2 | 1 | 1 | 1 | 2 | 1 | 2 | 2 | 1 | 2 | 1 | 1 | 2 | 24%  | 3   | 1.2%  |      |
| 137 | 1 | 2 | 1 | 1 | 2 | 2 | 1 | 2 | 1 | 2 | 1 | 2 | 2 | 2 | 2 | 48%  | 3   | 3.9%  |      |
| 138 | 2 | 2 | 1 | 2 | 2 | 1 | 1 | 2 | 2 | 1 | 2 | 1 | 2 | 1 | 1 | 48%  | 3   | 0.6%  |      |
| 139 | 1 | 2 | 1 | 1 | 1 | 1 | 1 | 1 | 2 | 1 | 2 | 2 | 1 | 1 | 2 | 32%  | 3   | 3.8%  |      |
| 140 | 1 | 2 | 1 | 2 | 1 | 2 | 2 | 2 | 1 | 1 | 1 | 2 | 2 | 2 | 1 | 49%  | 3   | 2.8%  |      |

|            |   |   |   |   |   |   |   |   |   |   |   |   |   |   |   |     |   |      |
|------------|---|---|---|---|---|---|---|---|---|---|---|---|---|---|---|-----|---|------|
| <b>141</b> | 2 | 1 | 1 | 1 | 2 | 1 | 2 | 2 | 2 | 2 | 1 | 1 | 2 | 1 | 1 | 33% | 3 | 3.2% |
| <b>142</b> | 1 | 1 | 2 | 2 | 2 | 2 | 1 | 1 | 1 | 1 | 2 | 1 | 1 | 1 | 2 | 31% | 3 | 1.6% |
| <b>143</b> | 2 | 1 | 1 | 1 | 2 | 1 | 1 | 1 | 2 | 1 | 2 | 2 | 1 | 2 | 1 | 27% | 3 | 1.6% |
| <b>144</b> | 2 | 1 | 1 | 2 | 1 | 1 | 1 | 1 | 2 | 1 | 1 | 2 | 2 | 1 | 2 | 71% | 3 | 0.6% |
| <b>145</b> | 2 | 2 | 1 | 2 | 1 | 1 | 1 | 2 | 1 | 1 | 1 | 2 | 2 | 1 | 2 | 74% | 3 | 1.0% |
| <b>146</b> | 1 | 1 | 2 | 1 | 2 | 1 | 2 | 2 | 2 | 2 | 1 | 2 | 1 | 1 | 2 | 19% | 3 | 1.3% |
| <b>147</b> | 2 | 2 | 2 | 1 | 2 | 1 | 2 | 2 | 2 | 2 | 2 | 1 | 2 | 2 | 1 | 37% | 3 | 2.3% |
| <b>148</b> | 1 | 1 | 2 | 1 | 2 | 1 | 2 | 2 | 2 | 1 | 2 | 1 | 2 | 2 | 1 | 32% | 3 | 4.3% |
| <b>149</b> | 1 | 1 | 2 | 1 | 2 | 2 | 1 | 1 | 2 | 1 | 1 | 2 | 2 | 2 | 1 | 21% | 3 | 3.4% |
| <b>150</b> | 2 | 1 | 2 | 2 | 1 | 2 | 2 | 2 | 1 | 2 | 1 | 1 | 1 | 1 | 1 | 29% | 3 | 3.7% |
| <b>SR</b>  |   |   |   |   |   |   |   |   |   |   |   |   |   |   |   | 31% | 3 | 0.3% |

Drug dose “1” and “2” represent 0% and 10% of the drug effect level, respectively. Data shown are mean % inhibition, number of replicates (N), and standard error (SE). SR, Standard Regimen tested at 10% of the drug effect level.
