# Supplementary material for: Artificial intelligence enabled parabolic response surface platform identifies ultra-rapid near-universal TB drug treatment regimens comprising approved drugs
Source: PubMed Central journal article supplement (PMC6510528; doi:10.1371/journal.pone.0215607), 2019-05-10
Supplement: pone.0215607.s003.pdf [file pone.0215607.s003.pdf]

**S3 Table. Iteration 1, three-level orthogonal array central composite design and experimental results.**

|                                                        |    |     |     |       |     |     |     |     |       |     |     | % Inhibition |   |       |
|--------------------------------------------------------|----|-----|-----|-------|-----|-----|-----|-----|-------|-----|-----|--------------|---|-------|
|                                                        |    |     |     |       |     |     |     |     |       |     |     | Mean         | N | SE    |
| Control 1 (no infection control)                       |    |     |     |       |     |     |     |     |       |     |     | 98%          | 4 | 0.4%  |
| Control 2 (no IPTG control)                            |    |     |     |       |     |     |     |     |       |     |     | 98%          | 4 | 0.2%  |
| Control 3 (no drug control)                            |    |     |     |       |     |     |     |     |       |     |     | 0%           | 8 | 5.6%  |
| Control 4 (all drug control, at 10% drug effect level) |    |     |     |       |     |     |     |     |       |     |     | 90%          | 2 | 1.0%  |
| Run/Drug                                               | AC | CFZ | EMB | PA824 | PAS | PRO | PZA | RIF | SQ109 | BDQ | DLM |              |   |       |
| 1                                                      | 2  | 2   | 3   | 1     | 3   | 1   | 3   | 1   | 1     | 1   | 2   | 59%          | 3 | 2.3%  |
| 2                                                      | 1  | 2   | 1   | 1     | 3   | 1   | 1   | 3   | 2     | 2   | 1   | 15%          | 3 | 3.4%  |
| 3                                                      | 3  | 2   | 2   | 2     | 1   | 1   | 3   | 1   | 2     | 2   | 3   | 83%          | 3 | 0.8%  |
| 4                                                      | 2  | 3   | 3   | 1     | 1   | 3   | 3   | 3   | 2     | 2   | 3   | 86%          | 3 | 1.0%  |
| 5                                                      | 1  | 1   | 1   | 2     | 3   | 2   | 2   | 3   | 3     | 3   | 3   | 80%          | 3 | 1.0%  |
| 6                                                      | 1  | 2   | 1   | 2     | 1   | 1   | 2   | 2   | 1     | 1   | 1   | 24%          | 3 | 6.1%  |
| 7                                                      | 2  | 1   | 3   | 1     | 2   | 2   | 3   | 2   | 3     | 3   | 1   | 54%          | 3 | 1.0%  |
| 8                                                      | 1  | 3   | 1   | 1     | 1   | 3   | 1   | 2   | 3     | 3   | 2   | 57%          | 3 | 1.2%  |
| 9                                                      | 2  | 2   | 3   | 3     | 2   | 1   | 2   | 2   | 2     | 2   | 2   | 67%          | 3 | 3.2%  |
| 10                                                     | 1  | 2   | 1   | 3     | 2   | 1   | 3   | 1   | 3     | 3   | 1   | 58%          | 3 | 0.6%  |
| 11                                                     | 1  | 3   | 1   | 3     | 3   | 3   | 3   | 3   | 1     | 1   | 2   | 68%          | 3 | 2.4%  |
| 12                                                     | 1  | 3   | 1   | 2     | 2   | 3   | 2   | 1   | 2     | 2   | 2   | 49%          | 3 | 4.1%  |
| 13                                                     | 3  | 2   | 2   | 3     | 2   | 1   | 1   | 3   | 1     | 1   | 3   | 94%          | 3 | 0.4%  |
| 14                                                     | 3  | 1   | 2   | 1     | 2   | 2   | 2   | 3   | 2     | 2   | 2   | 64%          | 3 | 3.0%  |
| 15                                                     | 3  | 2   | 2   | 1     | 3   | 1   | 2   | 2   | 3     | 3   | 3   | 78%          | 3 | 1.4%  |
| 16                                                     | 3  | 1   | 2   | 3     | 1   | 2   | 1   | 1   | 3     | 3   | 2   | 73%          | 3 | 2.3%  |
| 17                                                     | 1  | 1   | 1   | 3     | 1   | 2   | 3   | 2   | 2     | 2   | 3   | 82%          | 3 | 1.2%  |
| 18                                                     | 3  | 3   | 2   | 3     | 3   | 3   | 1   | 2   | 2     | 2   | 1   | 57%          | 3 | 2.7%  |
| 19                                                     | 2  | 2   | 3   | 2     | 1   | 1   | 1   | 3   | 3     | 3   | 2   | 79%          | 3 | 1.0%  |
| 20                                                     | 3  | 1   | 2   | 2     | 3   | 2   | 3   | 2   | 1     | 1   | 2   | 74%          | 3 | 1.2%  |
| 21                                                     | 2  | 3   | 3   | 2     | 2   | 3   | 1   | 2   | 1     | 1   | 3   | 86%          | 3 | 1.7%  |
| 22                                                     | 2  | 1   | 3   | 2     | 3   | 2   | 1   | 1   | 2     | 2   | 1   | 30%          | 3 | 2.7%  |
| 23                                                     | 3  | 3   | 2   | 1     | 1   | 3   | 2   | 1   | 1     | 1   | 1   | 50%          | 3 | 3.4%  |
| 24                                                     | 2  | 1   | 3   | 3     | 1   | 2   | 2   | 3   | 1     | 1   | 1   | 75%          | 3 | 0.4%  |
| 25                                                     | 3  | 3   | 2   | 2     | 2   | 3   | 3   | 3   | 3     | 3   | 1   | 74%          | 3 | 0.9%  |
| 26                                                     | 1  | 1   | 1   | 1     | 2   | 2   | 1   | 1   | 1     | 1   | 3   | 14%          | 3 | 8.5%  |
| 27                                                     | 2  | 3   | 3   | 3     | 3   | 3   | 2   | 1   | 3     | 3   | 3   | 87%          | 3 | 1.2%  |
| 28                                                     | 3  | 1   | 3   | 3     | 2   | 3   | 3   | 1   | 1     | 2   | 2   | 81%          | 3 | 1.1%  |
| 29                                                     | 3  | 3   | 3   | 3     | 1   | 1   | 3   | 2   | 3     | 1   | 1   | 79%          | 3 | 1.2%  |
| 30                                                     | 3  | 3   | 3   | 1     | 2   | 1   | 1   | 1   | 2     | 3   | 1   | 57%          | 3 | 3.7%  |
| 31                                                     | 1  | 1   | 2   | 3     | 2   | 3   | 2   | 2   | 3     | 1   | 3   | 83%          | 3 | 0.8%  |
| 32                                                     | 2  | 1   | 1   | 2     | 1   | 3   | 3   | 1   | 3     | 1   | 1   | 46%          | 3 | 4.0%  |
| 33                                                     | 2  | 2   | 1   | 3     | 3   | 2   | 1   | 2   | 3     | 1   | 2   | 71%          | 3 | 1.7%  |
| 34                                                     | 3  | 2   | 3   | 1     | 1   | 2   | 1   | 2   | 1     | 2   | 3   | 87%          | 3 | 0.5%  |
| 35                                                     | 1  | 3   | 2   | 1     | 2   | 1   | 3   | 2   | 1     | 2   | 2   | 38%          | 3 | 6.7%  |
| 36                                                     | 2  | 1   | 1   | 3     | 2   | 3   | 1   | 3   | 2     | 3   | 1   | 50%          | 3 | 1.9%  |
| 37                                                     | 2  | 2   | 1   | 1     | 1   | 2   | 2   | 1   | 2     | 3   | 2   | 30%          | 3 | 4.4%  |
| 38                                                     | 1  | 3   | 2   | 2     | 3   | 1   | 1   | 1   | 3     | 1   | 2   | 60%          | 3 | 1.6%  |
| 39                                                     | 2  | 1   | 1   | 1     | 3   | 3   | 2   | 2   | 1     | 2   | 1   | 36%          | 3 | 3.8%  |
| 40                                                     | 3  | 1   | 3   | 2     | 1   | 3   | 2   | 2   | 2     | 3   | 2   | 69%          | 3 | 0.6%  |
| 41                                                     | 2  | 2   | 1   | 2     | 2   | 2   | 3   | 3   | 1     | 2   | 2   | 61%          | 3 | 1.6%  |
| 42                                                     | 1  | 2   | 2   | 3     | 3   | 2   | 2   | 1   | 1     | 2   | 1   | 28%          | 3 | 12.1% |
| 43                                                     | 1  | 2   | 2   | 2     | 2   | 2   | 1   | 2   | 2     | 3   | 1   | 36%          | 3 | 2.3%  |
| 44                                                     | 3  | 3   | 3   | 2     | 3   | 1   | 2   | 3   | 1     | 2   | 1   | 77%          | 3 | 1.6%  |
| 45                                                     | 2  | 3   | 1   | 1     | 2   | 1   | 2   | 3   | 3     | 1   | 3   | 79%          | 3 | 1.7%  |
| 46                                                     | 1  | 1   | 2   | 1     | 3   | 3   | 3   | 1   | 2     | 3   | 3   | 45%          | 3 | 1.9%  |
| 47                                                     | 3  | 2   | 3   | 2     | 2   | 2   | 2   | 1   | 3     | 1   | 3   | 85%          | 3 | 1.0%  |
| 48                                                     | 1  | 1   | 2   | 2     | 1   | 3   | 1   | 3   | 1     | 2   | 3   | 86%          | 3 | 2.5%  |
| 49                                                     | 2  | 3   | 1   | 2     | 3   | 1   | 3   | 2   | 2     | 3   | 3   | 81%          | 3 | 0.6%  |
| 50                                                     | 1  | 3   | 2   | 3     | 1   | 1   | 2   | 3   | 2     | 3   | 2   | 62%          | 3 | 0.7%  |
| 51                                                     | 2  | 3   | 1   | 3     | 1   | 1   | 1   | 1   | 1     | 2   | 3   | 80%          | 3 | 3.4%  |
| 52                                                     | 1  | 2   | 2   | 1     | 1   | 2   | 3   | 3   | 3     | 1   | 1   | 57%          | 3 | 0.7%  |
| 53                                                     | 3  | 2   | 3   | 3     | 3   | 2   | 3   | 3   | 2     | 3   | 3   | 81%          | 3 | 0.9%  |
| 54                                                     | 3  | 1   | 3   | 1     | 3   | 3   | 1   | 3   | 3     | 1   | 2   | 73%          | 3 | 1.5%  |
| 55                                                     | 2  | 1   | 2   | 1     | 1   | 1   | 1   | 2   | 2     | 1   | 1   | 22%          | 3 | 6.1%  |
| 56                                                     | 2  | 1   | 2   | 2     | 2   | 1   | 2   | 1   | 1     | 3   | 1   | 32%          | 3 | 3.7%  |
| 57                                                     | 1  | 1   | 3   | 3     | 3   | 1   | 1   | 2   | 1     | 3   | 3   | 90%          | 3 | 1.1%  |
| 58                                                     | 3  | 3   | 1   | 2     | 1   | 2   | 1   | 3   | 2     | 1   | 1   | 53%          | 3 | 2.6%  |
| 59                                                     | 1  | 1   | 3   | 2     | 2   | 1   | 3   | 3   | 2     | 1   | 3   | 87%          | 3 | 1.7%  |
| 60                                                     | 3  | 3   | 1   | 3     | 2   | 2   | 2   | 2   | 1     | 3   | 1   | 61%          | 3 | 2.1%  |
| 61                                                     | 2  | 2   | 2   | 3     | 1   | 3   | 3   | 2   | 1     | 3   | 2   | 77%          | 3 | 1.8%  |
| 62                                                     | 3  | 1   | 1   | 3     | 3   | 1   | 2   | 1   | 2     | 1   | 2   | 53%          | 3 | 2.0%  |
| 63                                                     | 1  | 3   | 3   | 3     | 2   | 2   | 1   | 3   | 3     | 2   | 2   | 79%          | 3 | 1.3%  |
| 64                                                     | 2  | 2   | 2   | 1     | 2   | 3   | 1   | 1   | 3     | 2   | 2   | 60%          | 3 | 1.4%  |
| 65                                                     | 3  | 2   | 1   | 2     | 3   | 3   | 1   | 1   | 1     | 3   | 3   | 77%          | 3 | 3.3%  |

|     |   |   |   |   |   |   |   |   |   |   |   |     |   |      |
|-----|---|---|---|---|---|---|---|---|---|---|---|-----|---|------|
| 66  | 3 | 1 | 1 | 2 | 2 | 1 | 1 | 2 | 3 | 2 | 2 | 67% | 3 | 1.4% |
| 67  | 3 | 3 | 1 | 1 | 3 | 2 | 3 | 1 | 3 | 2 | 1 | 66% | 3 | 2.5% |
| 68  | 2 | 1 | 2 | 3 | 3 | 1 | 3 | 3 | 3 | 2 | 1 | 67% | 3 | 1.3% |
| 69  | 2 | 3 | 2 | 1 | 3 | 2 | 1 | 3 | 1 | 3 | 3 | 77% | 3 | 1.9% |
| 70  | 1 | 1 | 3 | 1 | 1 | 1 | 2 | 1 | 3 | 2 | 3 | 53% | 3 | 6.4% |
| 71  | 2 | 3 | 2 | 2 | 1 | 2 | 2 | 2 | 3 | 2 | 3 | 81% | 3 | 1.0% |
| 72  | 1 | 3 | 3 | 1 | 3 | 2 | 2 | 2 | 2 | 1 | 2 | 44% | 3 | 4.6% |
| 73  | 1 | 3 | 3 | 2 | 1 | 2 | 3 | 1 | 1 | 3 | 2 | 68% | 3 | 1.8% |
| 74  | 2 | 3 | 2 | 3 | 2 | 2 | 3 | 1 | 2 | 1 | 3 | 84% | 3 | 2.1% |
| 75  | 3 | 2 | 1 | 3 | 1 | 3 | 2 | 3 | 3 | 2 | 3 | 89% | 3 | 0.6% |
| 76  | 1 | 2 | 3 | 2 | 3 | 3 | 3 | 2 | 3 | 2 | 1 | 53% | 3 | 2.2% |
| 77  | 1 | 2 | 3 | 3 | 1 | 3 | 1 | 1 | 2 | 1 | 1 | 49% | 3 | 1.2% |
| 78  | 1 | 2 | 3 | 1 | 2 | 3 | 2 | 3 | 1 | 3 | 1 | 55% | 3 | 0.3% |
| 79  | 3 | 2 | 1 | 1 | 2 | 3 | 3 | 2 | 2 | 1 | 3 | 69% | 3 | 1.7% |
| 80  | 2 | 2 | 2 | 2 | 3 | 3 | 2 | 3 | 2 | 1 | 2 | 57% | 3 | 4.6% |
| 81  | 3 | 1 | 1 | 1 | 1 | 1 | 3 | 3 | 1 | 3 | 2 | 66% | 3 | 3.3% |
| 82  | 2 | 2 | 2 | 2 | 2 | 2 | 2 | 2 | 2 | 2 | 2 | 59% | 3 | 0.6% |
| 83  | 2 | 3 | 1 | 1 | 2 | 1 | 1 | 3 | 1 | 1 | 1 | 45% | 3 | 3.9% |
| 84  | 3 | 2 | 1 | 1 | 1 | 2 | 1 | 1 | 1 | 3 | 1 | 34% | 3 | 7.4% |
| 85  | 2 | 1 | 3 | 1 | 1 | 1 | 3 | 1 | 1 | 1 | 2 | 51% | 3 | 2.7% |
| 86  | 3 | 1 | 2 | 1 | 1 | 1 | 1 | 1 | 3 | 1 | 1 | 62% | 3 | 2.4% |
| 87  | 2 | 1 | 1 | 2 | 3 | 1 | 1 | 2 | 1 | 1 | 1 | 34% | 3 | 5.7% |
| 88  | 3 | 1 | 1 | 1 | 2 | 1 | 1 | 1 | 3 | 1 | 3 | 73% | 3 | 3.2% |
| 89  | 2 | 1 | 1 | 3 | 1 | 1 | 2 | 3 | 1 | 1 | 1 | 52% | 3 | 3.0% |
| 90  | 3 | 1 | 2 | 1 | 1 | 1 | 1 | 2 | 1 | 3 | 1 | 52% | 3 | 3.9% |
| 91  | 2 | 3 | 1 | 1 | 1 | 2 | 1 | 1 | 1 | 1 | 3 | 63% | 3 | 3.1% |
| 92  | 3 | 1 | 1 | 3 | 1 | 1 | 1 | 1 | 2 | 1 | 2 | 64% | 3 | 1.6% |
| 93  | 1 | 2 | 1 | 1 | 2 | 1 | 3 | 1 | 1 | 3 | 1 | 34% | 3 | 6.3% |
| 94  | 1 | 1 | 1 | 1 | 3 | 3 | 1 | 1 | 1 | 2 | 2 | 27% | 3 | 2.2% |
| 95  | 1 | 1 | 1 | 3 | 2 | 1 | 1 | 1 | 2 | 1 | 3 | 48% | 3 | 3.3% |
| 96  | 1 | 1 | 2 | 1 | 3 | 1 | 1 | 3 | 1 | 1 | 2 | 26% | 3 | 5.4% |
| 97  | 1 | 1 | 1 | 2 | 1 | 1 | 2 | 1 | 1 | 2 | 3 | 36% | 3 | 2.2% |
| 98  | 1 | 3 | 1 | 1 | 1 | 1 | 3 | 3 | 1 | 1 | 2 | 46% | 3 | 5.1% |
| 99  | 1 | 1 | 2 | 1 | 1 | 3 | 1 | 1 | 1 | 3 | 2 | 22% | 3 | 3.8% |
| 100 | 1 | 1 | 3 | 1 | 1 | 1 | 1 | 2 | 1 | 2 | 3 | 77% | 3 | 1.0% |
| 101 | 1 | 2 | 1 | 1 | 3 | 2 | 1 | 1 | 2 | 1 | 1 | 12% | 3 | 5.8% |
| 102 | 3 | 2 | 1 | 3 | 1 | 1 | 2 | 1 | 2 | 1 | 1 | 59% | 3 | 1.1% |
| SR  |   |   |   |   |   |   |   |   |   |   |   | 55% | 3 | 1.5% |

Drug dose “1”, “2” and “3” represent 0%, 5% and 10% of the drug effect level, respectively. Data shown are mean % inhibition, number of replicates (N), and standard error (SE). SR, Standard Regimen tested at 10% of the drug effect level.
