# Supplementary material for: Artificial intelligence enabled parabolic response surface platform identifies ultra-rapid near-universal TB drug treatment regimens comprising approved drugs
Source: PubMed Central journal article supplement (PMC6510528; doi:10.1371/journal.pone.0215607), 2019-05-10
Supplement: pone.0215607.s004.pdf [file pone.0215607.s004.pdf]

**S4 Table. Iteration 2, three-level orthogonal array central composite design and experimental results.**

| Run/Drug                                               | AC | CFZ | EMB | PA824 | PZA | RIF | SQ109 | BDQ | DLM | % Inhibition |   |      |
|--------------------------------------------------------|----|-----|-----|-------|-----|-----|-------|-----|-----|--------------|---|------|
|                                                        |    |     |     |       |     |     |       |     |     | Mean         | N | SE   |
| Control 1 (no infection control)                       |    |     |     |       |     |     |       |     |     | 99%          | 6 | 0.1% |
| Control 2 (no IPTG control)                            |    |     |     |       |     |     |       |     |     | 98%          | 7 | 0.1% |
| Control 3 (no drug control)                            |    |     |     |       |     |     |       |     |     | 0%           | 8 | 6.4% |
| Control 4 (all drug control, at 15% drug effect level) |    |     |     |       |     |     |       |     |     | 89%          | 3 | 0.5% |
| 1                                                      | 1  | 1   | 1   | 1     | 1   | 1   | 1     | 1   | 1   | -8%          | 3 | 7.5% |
| 2                                                      | 1  | 1   | 1   | 1     | 1   | 1   | 3     | 1   | 3   | 57%          | 3 | 4.6% |
| 3                                                      | 1  | 1   | 1   | 1     | 1   | 3   | 1     | 1   | 3   | 84%          | 3 | 0.4% |
| 4                                                      | 1  | 1   | 1   | 1     | 1   | 3   | 3     | 1   | 1   | 80%          | 3 | 3.0% |
| 5                                                      | 1  | 1   | 1   | 1     | 3   | 1   | 1     | 3   | 1   | 34%          | 3 | 3.7% |
| 6                                                      | 1  | 1   | 1   | 1     | 3   | 1   | 3     | 3   | 3   | 67%          | 3 | 5.8% |
| 7                                                      | 1  | 1   | 1   | 1     | 3   | 3   | 1     | 3   | 3   | 85%          | 3 | 3.0% |
| 8                                                      | 1  | 1   | 1   | 1     | 3   | 3   | 3     | 3   | 1   | 80%          | 3 | 1.8% |
| 9                                                      | 1  | 1   | 1   | 3     | 1   | 1   | 1     | 3   | 1   | 47%          | 3 | 3.7% |
| 10                                                     | 1  | 1   | 1   | 3     | 1   | 1   | 3     | 3   | 3   | 79%          | 3 | 2.8% |
| 11                                                     | 1  | 1   | 1   | 3     | 1   | 3   | 1     | 3   | 3   | 95%          | 3 | 0.5% |
| 12                                                     | 1  | 1   | 1   | 3     | 1   | 3   | 3     | 3   | 1   | 81%          | 3 | 0.1% |
| 13                                                     | 1  | 1   | 1   | 3     | 3   | 1   | 1     | 1   | 1   | 31%          | 3 | 2.7% |
| 14                                                     | 1  | 1   | 1   | 3     | 3   | 1   | 3     | 1   | 3   | 83%          | 3 | 2.9% |
| 15                                                     | 1  | 1   | 1   | 3     | 3   | 3   | 1     | 1   | 3   | 94%          | 3 | 0.9% |
| 16                                                     | 1  | 1   | 1   | 3     | 3   | 3   | 3     | 1   | 1   | 88%          | 3 | 0.9% |
| 17                                                     | 1  | 1   | 3   | 1     | 1   | 1   | 1     | 3   | 3   | 62%          | 3 | 3.4% |
| 18                                                     | 1  | 1   | 3   | 1     | 1   | 1   | 3     | 3   | 1   | 51%          | 3 | 2.3% |
| 19                                                     | 1  | 1   | 3   | 1     | 1   | 3   | 1     | 3   | 1   | 93%          | 3 | 0.4% |
| 20                                                     | 1  | 1   | 3   | 1     | 1   | 3   | 3     | 3   | 3   | 93%          | 3 | 0.3% |
| 21                                                     | 1  | 1   | 3   | 1     | 3   | 1   | 1     | 1   | 3   | 69%          | 3 | 3.8% |
| 22                                                     | 1  | 1   | 3   | 1     | 3   | 1   | 3     | 1   | 1   | 50%          | 3 | 3.7% |
| 23                                                     | 1  | 1   | 3   | 1     | 3   | 3   | 1     | 1   | 1   | 91%          | 3 | 1.9% |
| 24                                                     | 1  | 1   | 3   | 1     | 3   | 3   | 3     | 1   | 3   | 92%          | 3 | 0.6% |
| 25                                                     | 1  | 1   | 3   | 3     | 1   | 1   | 1     | 1   | 3   | 83%          | 3 | 0.5% |
| 26                                                     | 1  | 1   | 3   | 3     | 1   | 1   | 3     | 1   | 1   | 61%          | 3 | 1.9% |
| 27                                                     | 1  | 1   | 3   | 3     | 1   | 3   | 1     | 1   | 1   | 96%          | 3 | 0.6% |
| 28                                                     | 1  | 1   | 3   | 3     | 1   | 3   | 3     | 1   | 3   | 97%          | 3 | 0.2% |
| 29                                                     | 1  | 1   | 3   | 3     | 3   | 1   | 1     | 3   | 3   | 85%          | 3 | 1.9% |
| 30                                                     | 1  | 1   | 3   | 3     | 3   | 1   | 3     | 3   | 1   | 76%          | 3 | 1.0% |
| 31                                                     | 1  | 1   | 3   | 3     | 3   | 3   | 1     | 3   | 1   | 94%          | 3 | 0.4% |
| 32                                                     | 1  | 1   | 3   | 3     | 3   | 3   | 3     | 3   | 3   | 97%          | 3 | 0.3% |
| 33                                                     | 1  | 3   | 1   | 1     | 1   | 1   | 1     | 3   | 3   | 65%          | 3 | 2.2% |
| 34                                                     | 1  | 3   | 1   | 1     | 1   | 1   | 3     | 3   | 1   | 72%          | 3 | 3.0% |
| 35                                                     | 1  | 3   | 1   | 1     | 1   | 3   | 1     | 3   | 1   | 47%          | 3 | 1.7% |
| 36                                                     | 1  | 3   | 1   | 1     | 1   | 3   | 3     | 3   | 3   | 83%          | 3 | 0.7% |
| 37                                                     | 1  | 3   | 1   | 1     | 3   | 1   | 1     | 1   | 3   | 83%          | 3 | 1.2% |
| 38                                                     | 1  | 3   | 1   | 1     | 3   | 1   | 3     | 1   | 1   | 74%          | 3 | 3.2% |
| 39                                                     | 1  | 3   | 1   | 1     | 3   | 3   | 1     | 1   | 1   | 66%          | 3 | 2.2% |
| 40                                                     | 1  | 3   | 1   | 1     | 3   | 3   | 3     | 1   | 3   | 89%          | 3 | 1.5% |
| 41                                                     | 1  | 3   | 1   | 3     | 1   | 1   | 1     | 1   | 3   | 89%          | 3 | 0.8% |
| 42                                                     | 1  | 3   | 1   | 3     | 1   | 1   | 3     | 1   | 1   | 78%          | 3 | 2.5% |
| 43                                                     | 1  | 3   | 1   | 3     | 1   | 3   | 1     | 1   | 1   | 52%          | 3 | 2.3% |
| 44                                                     | 1  | 3   | 1   | 3     | 1   | 3   | 3     | 1   | 3   | 91%          | 3 | 0.3% |
| 45                                                     | 1  | 3   | 1   | 3     | 3   | 1   | 1     | 3   | 3   | 88%          | 3 | 1.0% |
| 46                                                     | 1  | 3   | 1   | 3     | 3   | 1   | 3     | 3   | 1   | 85%          | 3 | 1.2% |
| 47                                                     | 1  | 3   | 1   | 3     | 3   | 3   | 1     | 3   | 1   | 80%          | 3 | 1.4% |
| 48                                                     | 1  | 3   | 1   | 3     | 3   | 3   | 3     | 3   | 3   | 88%          | 3 | 1.2% |
| 49                                                     | 1  | 3   | 3   | 1     | 1   | 1   | 1     | 1   | 1   | 72%          | 3 | 1.8% |
| 50                                                     | 1  | 3   | 3   | 1     | 1   | 1   | 3     | 1   | 3   | 83%          | 3 | 0.7% |
| 51                                                     | 1  | 3   | 3   | 1     | 1   | 3   | 1     | 1   | 3   | 94%          | 3 | 1.3% |
| 52                                                     | 1  | 3   | 3   | 1     | 1   | 3   | 3     | 1   | 1   | 84%          | 3 | 1.2% |
| 53                                                     | 1  | 3   | 3   | 1     | 3   | 1   | 1     | 3   | 1   | 84%          | 3 | 2.6% |
| 54                                                     | 1  | 3   | 3   | 1     | 3   | 1   | 3     | 3   | 3   | 90%          | 3 | 1.9% |
| 55                                                     | 1  | 3   | 3   | 1     | 3   | 3   | 1     | 3   | 3   | 90%          | 3 | 0.4% |
| 56                                                     | 1  | 3   | 3   | 1     | 3   | 3   | 3     | 3   | 1   | 85%          | 3 | 2.5% |
| 57                                                     | 1  | 3   | 3   | 3     | 1   | 1   | 1     | 3   | 1   | 84%          | 3 | 1.1% |
| 58                                                     | 1  | 3   | 3   | 3     | 1   | 1   | 3     | 3   | 3   | 87%          | 3 | 0.1% |
| 59                                                     | 1  | 3   | 3   | 3     | 1   | 3   | 1     | 3   | 3   | 92%          | 3 | 0.4% |
| 60                                                     | 1  | 3   | 3   | 3     | 1   | 3   | 3     | 3   | 1   | 84%          | 3 | 1.0% |
| 61                                                     | 1  | 3   | 3   | 3     | 3   | 1   | 1     | 1   | 1   | 86%          | 3 | 0.9% |
| 62                                                     | 1  | 3   | 3   | 3     | 3   | 1   | 3     | 1   | 3   | 88%          | 3 | 2.1% |
| 63                                                     | 1  | 3   | 3   | 3     | 3   | 3   | 1     | 1   | 3   | 93%          | 3 | 0.6% |
| 64                                                     | 1  | 3   | 3   | 3     | 3   | 3   | 3     | 1   | 1   | 89%          | 3 | 0.7% |
| 65                                                     | 3  | 1   | 1   | 1     | 1   | 1   | 1     | 3   | 3   | 64%          | 3 | 7.0% |

|     |   |   |   |   |   |   |   |   |   |     |   |      |
|-----|---|---|---|---|---|---|---|---|---|-----|---|------|
| 66  | 3 | 1 | 1 | 1 | 1 | 1 | 3 | 3 | 1 | 47% | 3 | 1.0% |
| 67  | 3 | 1 | 1 | 1 | 1 | 3 | 1 | 3 | 1 | 61% | 3 | 2.6% |
| 68  | 3 | 1 | 1 | 1 | 1 | 3 | 3 | 3 | 3 | 92% | 3 | 0.6% |
| 69  | 3 | 1 | 1 | 1 | 3 | 1 | 1 | 1 | 3 | 73% | 3 | 4.5% |
| 70  | 3 | 1 | 1 | 1 | 3 | 1 | 3 | 1 | 1 | 63% | 3 | 2.1% |
| 71  | 3 | 1 | 1 | 1 | 3 | 3 | 1 | 1 | 1 | 79% | 3 | 3.3% |
| 72  | 3 | 1 | 1 | 1 | 3 | 3 | 3 | 1 | 3 | 94% | 3 | 0.7% |
| 73  | 3 | 1 | 1 | 3 | 1 | 1 | 1 | 1 | 3 | 86% | 3 | 1.9% |
| 74  | 3 | 1 | 1 | 3 | 1 | 1 | 3 | 1 | 1 | 69% | 3 | 1.0% |
| 75  | 3 | 1 | 1 | 3 | 1 | 3 | 1 | 1 | 1 | 76% | 3 | 1.9% |
| 76  | 3 | 1 | 1 | 3 | 1 | 3 | 3 | 1 | 3 | 95% | 3 | 1.1% |
| 77  | 3 | 1 | 1 | 3 | 3 | 1 | 1 | 3 | 3 | 87% | 3 | 1.2% |
| 78  | 3 | 1 | 1 | 3 | 3 | 1 | 3 | 3 | 1 | 76% | 3 | 1.3% |
| 79  | 3 | 1 | 1 | 3 | 3 | 3 | 1 | 3 | 1 | 84% | 3 | 1.4% |
| 80  | 3 | 1 | 1 | 3 | 3 | 3 | 3 | 3 | 3 | 97% | 3 | 0.3% |
| 81  | 3 | 1 | 3 | 1 | 1 | 1 | 1 | 1 | 1 | 71% | 3 | 2.6% |
| 82  | 3 | 1 | 3 | 1 | 1 | 1 | 3 | 1 | 3 | 89% | 3 | 1.0% |
| 83  | 3 | 1 | 3 | 1 | 1 | 3 | 1 | 1 | 3 | 99% | 3 | 0.0% |
| 84  | 3 | 1 | 3 | 1 | 1 | 3 | 3 | 1 | 1 | 89% | 3 | 0.6% |
| 85  | 3 | 1 | 3 | 1 | 3 | 1 | 1 | 3 | 1 | 67% | 3 | 1.6% |
| 86  | 3 | 1 | 3 | 1 | 3 | 1 | 3 | 3 | 3 | 84% | 3 | 2.5% |
| 87  | 3 | 1 | 3 | 1 | 3 | 3 | 1 | 3 | 3 | 98% | 3 | 0.2% |
| 88  | 3 | 1 | 3 | 1 | 3 | 3 | 3 | 3 | 1 | 87% | 3 | 1.1% |
| 89  | 3 | 1 | 3 | 3 | 1 | 1 | 1 | 3 | 1 | 85% | 3 | 1.3% |
| 90  | 3 | 1 | 3 | 3 | 1 | 1 | 3 | 3 | 3 | 91% | 3 | 0.5% |
| 91  | 3 | 1 | 3 | 3 | 1 | 3 | 1 | 3 | 3 | 99% | 3 | 0.1% |
| 92  | 3 | 1 | 3 | 3 | 1 | 3 | 3 | 3 | 1 | 93% | 3 | 0.3% |
| 93  | 3 | 1 | 3 | 3 | 3 | 1 | 1 | 1 | 1 | 82% | 3 | 1.1% |
| 94  | 3 | 1 | 3 | 3 | 3 | 1 | 3 | 1 | 3 | 94% | 3 | 0.6% |
| 95  | 3 | 1 | 3 | 3 | 3 | 3 | 1 | 1 | 3 | 99% | 3 | 0.1% |
| 96  | 3 | 1 | 3 | 3 | 3 | 3 | 3 | 1 | 1 | 94% | 3 | 0.4% |
| 97  | 3 | 3 | 1 | 1 | 1 | 1 | 1 | 1 | 1 | 59% | 3 | 4.0% |
| 98  | 3 | 3 | 1 | 1 | 1 | 1 | 3 | 1 | 3 | 87% | 3 | 0.9% |
| 99  | 3 | 3 | 1 | 1 | 1 | 3 | 1 | 1 | 3 | 88% | 3 | 1.3% |
| 100 | 3 | 3 | 1 | 1 | 1 | 3 | 3 | 1 | 1 | 81% | 3 | 2.4% |
| 101 | 3 | 3 | 1 | 1 | 3 | 1 | 1 | 3 | 1 | 74% | 3 | 0.9% |
| 102 | 3 | 3 | 1 | 1 | 3 | 1 | 3 | 3 | 3 | 89% | 3 | 1.2% |
| 103 | 3 | 3 | 1 | 1 | 3 | 3 | 1 | 3 | 3 | 87% | 3 | 0.6% |
| 104 | 3 | 3 | 1 | 1 | 3 | 3 | 3 | 3 | 1 | 85% | 3 | 0.5% |
| 105 | 3 | 3 | 1 | 3 | 1 | 1 | 1 | 3 | 1 | 71% | 3 | 1.3% |
| 106 | 3 | 3 | 1 | 3 | 1 | 1 | 3 | 3 | 3 | 91% | 3 | 0.9% |
| 107 | 3 | 3 | 1 | 3 | 1 | 3 | 1 | 3 | 3 | 90% | 3 | 0.5% |
| 108 | 3 | 3 | 1 | 3 | 1 | 3 | 3 | 3 | 1 | 82% | 3 | 1.3% |
| 109 | 3 | 3 | 1 | 3 | 3 | 1 | 1 | 1 | 1 | 80% | 3 | 1.6% |
| 110 | 3 | 3 | 1 | 3 | 3 | 1 | 3 | 1 | 3 | 89% | 3 | 2.1% |
| 111 | 3 | 3 | 1 | 3 | 3 | 3 | 1 | 1 | 3 | 91% | 3 | 1.3% |
| 112 | 3 | 3 | 1 | 3 | 3 | 3 | 3 | 1 | 1 | 86% | 3 | 1.4% |
| 113 | 3 | 3 | 3 | 1 | 1 | 1 | 1 | 3 | 3 | 92% | 3 | 0.2% |
| 114 | 3 | 3 | 3 | 1 | 1 | 1 | 3 | 3 | 1 | 78% | 3 | 1.1% |
| 115 | 3 | 3 | 3 | 1 | 1 | 3 | 1 | 3 | 1 | 85% | 3 | 1.0% |
| 116 | 3 | 3 | 3 | 1 | 1 | 3 | 3 | 3 | 3 | 89% | 3 | 1.3% |
| 117 | 3 | 3 | 3 | 1 | 3 | 1 | 1 | 1 | 3 | 90% | 3 | 1.3% |
| 118 | 3 | 3 | 3 | 1 | 3 | 1 | 3 | 1 | 1 | 83% | 3 | 2.7% |
| 119 | 3 | 3 | 3 | 1 | 3 | 3 | 1 | 1 | 1 | 90% | 3 | 0.4% |
| 120 | 3 | 3 | 3 | 1 | 3 | 3 | 3 | 1 | 3 | 88% | 3 | 0.6% |
| 121 | 3 | 3 | 3 | 3 | 1 | 1 | 1 | 1 | 3 | 90% | 3 | 0.7% |
| 122 | 3 | 3 | 3 | 3 | 1 | 1 | 3 | 1 | 1 | 85% | 3 | 1.1% |
| 123 | 3 | 3 | 3 | 3 | 1 | 3 | 1 | 1 | 1 | 91% | 3 | 0.6% |
| 124 | 3 | 3 | 3 | 3 | 1 | 3 | 3 | 1 | 3 | 90% | 3 | 0.9% |
| 125 | 3 | 3 | 3 | 3 | 3 | 1 | 1 | 3 | 3 | 93% | 3 | 0.4% |
| 126 | 3 | 3 | 3 | 3 | 3 | 1 | 3 | 3 | 1 | 85% | 3 | 1.6% |
| 127 | 3 | 3 | 3 | 3 | 3 | 3 | 1 | 3 | 1 | 89% | 3 | 0.3% |
| 128 | 3 | 3 | 3 | 3 | 3 | 3 | 3 | 3 | 3 | 91% | 3 | 0.4% |
| 129 | 1 | 1 | 1 | 1 | 1 | 1 | 1 | 1 | 1 | 2%  | 3 | 7.8% |
| 130 | 1 | 1 | 2 | 2 | 1 | 3 | 2 | 3 | 3 | 96% | 3 | 0.4% |
| 131 | 1 | 1 | 3 | 3 | 1 | 2 | 3 | 2 | 2 | 91% | 3 | 0.2% |
| 132 | 1 | 2 | 1 | 2 | 3 | 2 | 1 | 2 | 3 | 90% | 3 | 0.8% |
| 133 | 1 | 2 | 2 | 3 | 3 | 1 | 2 | 1 | 2 | 80% | 3 | 2.6% |
| 134 | 1 | 2 | 3 | 1 | 3 | 3 | 3 | 3 | 1 | 87% | 3 | 0.6% |
| 135 | 1 | 3 | 1 | 3 | 2 | 3 | 1 | 3 | 2 | 75% | 3 | 1.9% |
| 136 | 1 | 3 | 2 | 1 | 2 | 2 | 2 | 2 | 1 | 56% | 3 | 2.8% |
| 137 | 1 | 3 | 3 | 2 | 2 | 1 | 3 | 1 | 3 | 87% | 3 | 1.0% |
| 138 | 2 | 1 | 1 | 2 | 2 | 2 | 2 | 1 | 2 | 39% | 3 | 4.1% |
| 139 | 2 | 1 | 2 | 3 | 2 | 1 | 3 | 3 | 1 | 68% | 3 | 1.7% |
| 140 | 2 | 1 | 3 | 1 | 2 | 3 | 1 | 2 | 3 | 98% | 3 | 0.1% |

|     |   |   |   |   |   |   |   |   |   |     |   |      |
|-----|---|---|---|---|---|---|---|---|---|-----|---|------|
| 141 | 2 | 2 | 1 | 3 | 1 | 3 | 2 | 2 | 1 | 69% | 3 | 2.8% |
| 142 | 2 | 2 | 2 | 1 | 1 | 2 | 3 | 1 | 3 | 90% | 3 | 0.4% |
| 143 | 2 | 2 | 3 | 2 | 1 | 1 | 1 | 3 | 2 | 88% | 3 | 1.0% |
| 144 | 2 | 3 | 1 | 1 | 3 | 1 | 2 | 3 | 3 | 85% | 3 | 1.3% |
| 145 | 2 | 3 | 2 | 2 | 3 | 3 | 3 | 2 | 2 | 86% | 3 | 1.1% |
| 146 | 2 | 3 | 3 | 3 | 3 | 2 | 1 | 1 | 1 | 87% | 3 | 0.6% |
| 147 | 3 | 1 | 1 | 3 | 3 | 3 | 3 | 1 | 3 | 96% | 3 | 0.1% |
| 148 | 3 | 1 | 2 | 1 | 3 | 2 | 1 | 3 | 2 | 84% | 3 | 0.3% |
| 149 | 3 | 1 | 3 | 2 | 3 | 1 | 2 | 2 | 1 | 58% | 3 | 6.4% |
| 150 | 3 | 2 | 1 | 1 | 2 | 1 | 3 | 2 | 2 | 71% | 3 | 2.9% |
| 151 | 3 | 2 | 2 | 2 | 2 | 3 | 1 | 1 | 1 | 84% | 3 | 1.8% |
| 152 | 3 | 2 | 3 | 3 | 2 | 2 | 2 | 3 | 3 | 93% | 3 | 0.4% |
| 153 | 3 | 3 | 1 | 2 | 1 | 2 | 3 | 3 | 1 | 75% | 3 | 3.0% |
| 154 | 3 | 3 | 2 | 3 | 1 | 1 | 1 | 2 | 3 | 91% | 3 | 0.8% |
| 155 | 3 | 3 | 3 | 1 | 1 | 3 | 2 | 1 | 2 | 86% | 3 | 0.6% |
| SR  |   |   |   |   |   |   |   |   |   | 70% | 3 | 1.8% |

Drug dose “1”, “2” and “3” represent 0%, 7.5% and 15% of the drug effect level, respectively. Data shown are mean % inhibition, number of replicates (N), and standard error (SE). SR, Standard Regimen tested at 15% of the drug effect level.
