# Supplementary material for: Artificial intelligence enabled parabolic response surface platform identifies ultra-rapid near-universal TB drug treatment regimens comprising approved drugs
Source: PubMed Central journal article supplement (PMC6510528; doi:10.1371/journal.pone.0215607), 2019-05-10
Supplement: pone.0215607.s005.pdf [file pone.0215607.s005.pdf]

**S5 Table. Iteration 3A, five-level orthogonal array central composite design and experimental results.**

|                                  |    |     |       |     |     |     | % Inhibition |    |       |
|----------------------------------|----|-----|-------|-----|-----|-----|--------------|----|-------|
|                                  |    |     |       |     |     |     | Mean         | N  | SE    |
| Control 1 (no infection control) |    |     |       |     |     |     | 97%          | 4  | 0.3%  |
| Control 2 (no IPTG control)      |    |     |       |     |     |     | 98%          | 4  | 0.2%  |
| Control 3 (no drug control)      |    |     |       |     |     |     | 0%           | 34 | 1.8%  |
| Control 4 (all drug control)     |    |     |       |     |     |     | 87%          | 2  | 1.3%  |
| Run/Drug                         | AC | CFZ | PA824 | RIF | BDQ | DLM |              |    |       |
| 1                                | 1  | 1   | 1     | 1   | 1   | 1   | 0%           | 3  | 9.9%  |
| 2                                | 1  | 1   | 1     | 1   | 5   | 5   | 50%          | 3  | 3.8%  |
| 3                                | 1  | 1   | 1     | 5   | 1   | 5   | 86%          | 3  | 1.4%  |
| 4                                | 1  | 1   | 1     | 5   | 5   | 1   | 31%          | 3  | 7.3%  |
| 5                                | 1  | 1   | 5     | 1   | 1   | 5   | 81%          | 3  | 1.7%  |
| 6                                | 1  | 1   | 5     | 1   | 5   | 1   | 51%          | 3  | 3.9%  |
| 7                                | 1  | 1   | 5     | 5   | 1   | 1   | 59%          | 3  | 3.1%  |
| 8                                | 1  | 1   | 5     | 5   | 5   | 5   | 94%          | 3  | 0.2%  |
| 9                                | 1  | 5   | 1     | 1   | 1   | 5   | 62%          | 3  | 4.3%  |
| 10                               | 1  | 5   | 1     | 1   | 5   | 1   | 32%          | 3  | 8.0%  |
| 11                               | 1  | 5   | 1     | 5   | 1   | 1   | 20%          | 3  | 4.9%  |
| 12                               | 1  | 5   | 1     | 5   | 5   | 5   | 54%          | 3  | 6.6%  |
| 13                               | 1  | 5   | 5     | 1   | 1   | 1   | 48%          | 3  | 2.7%  |
| 14                               | 1  | 5   | 5     | 1   | 5   | 5   | 79%          | 3  | 0.8%  |
| 15                               | 1  | 5   | 5     | 5   | 1   | 5   | 85%          | 3  | 1.5%  |
| 16                               | 1  | 5   | 5     | 5   | 5   | 1   | 50%          | 3  | 3.3%  |
| 17                               | 5  | 1   | 1     | 1   | 1   | 5   | 58%          | 3  | 3.5%  |
| 18                               | 5  | 1   | 1     | 1   | 5   | 1   | 18%          | 3  | 10.7% |
| 19                               | 5  | 1   | 1     | 5   | 1   | 1   | 53%          | 3  | 7.5%  |
| 20                               | 5  | 1   | 1     | 5   | 5   | 5   | 90%          | 3  | 0.0%  |
| 21                               | 5  | 1   | 5     | 1   | 1   | 1   | 67%          | 3  | 2.4%  |
| 22                               | 5  | 1   | 5     | 1   | 5   | 5   | 85%          | 3  | 2.5%  |
| 23                               | 5  | 1   | 5     | 5   | 1   | 5   | 95%          | 3  | 0.7%  |
| 24                               | 5  | 1   | 5     | 5   | 5   | 1   | 70%          | 3  | 1.0%  |
| 25                               | 5  | 5   | 1     | 1   | 1   | 1   | 38%          | 3  | 4.0%  |
| 26                               | 5  | 5   | 1     | 1   | 5   | 5   | 68%          | 3  | 3.0%  |
| 27                               | 5  | 5   | 1     | 5   | 1   | 5   | 77%          | 3  | 1.2%  |
| 28                               | 5  | 5   | 1     | 5   | 5   | 1   | 41%          | 3  | 6.9%  |
| 29                               | 5  | 5   | 5     | 1   | 1   | 5   | 90%          | 3  | 0.9%  |
| 30                               | 5  | 5   | 5     | 1   | 5   | 1   | 64%          | 3  | 4.3%  |
| 31                               | 5  | 5   | 5     | 5   | 1   | 1   | 58%          | 3  | 3.3%  |
| 32                               | 5  | 5   | 5     | 5   | 5   | 5   | 87%          | 3  | 0.8%  |
| 33                               | 1  | 1   | 1     | 1   | 1   | 1   | 15%          | 3  | 5.4%  |
| 34                               | 1  | 3   | 3     | 3   | 3   | 3   | 46%          | 3  | 1.4%  |
| 35                               | 1  | 5   | 5     | 5   | 5   | 5   | 83%          | 3  | 0.5%  |
| 36                               | 3  | 1   | 1     | 3   | 3   | 5   | 81%          | 3  | 1.4%  |
| 37                               | 3  | 3   | 3     | 5   | 5   | 1   | 32%          | 3  | 1.4%  |
| 38                               | 3  | 5   | 5     | 1   | 1   | 3   | 75%          | 3  | 2.1%  |
| 39                               | 5  | 1   | 3     | 1   | 5   | 3   | 61%          | 3  | 0.7%  |
| 40                               | 5  | 3   | 5     | 3   | 1   | 5   | 91%          | 3  | 0.4%  |
| 41                               | 5  | 5   | 1     | 5   | 3   | 1   | 36%          | 3  | 2.4%  |
| 42                               | 1  | 1   | 5     | 5   | 3   | 3   | 83%          | 3  | 0.6%  |
| 43                               | 1  | 3   | 1     | 1   | 5   | 5   | 63%          | 3  | 4.9%  |

|    |   |   |   |   |   |   |     |   |      |
|----|---|---|---|---|---|---|-----|---|------|
| 44 | 1 | 5 | 3 | 3 | 1 | 1 | 24% | 3 | 5.4% |
| 45 | 3 | 1 | 3 | 5 | 1 | 5 | 92% | 3 | 0.2% |
| 46 | 3 | 3 | 5 | 1 | 3 | 1 | 66% | 3 | 2.9% |
| 47 | 3 | 5 | 1 | 3 | 5 | 3 | 34% | 3 | 5.9% |
| 48 | 5 | 1 | 5 | 3 | 5 | 1 | 70% | 3 | 1.7% |
| 49 | 5 | 3 | 1 | 5 | 1 | 3 | 39% | 3 | 4.7% |
| 50 | 5 | 5 | 3 | 1 | 3 | 5 | 82% | 3 | 0.3% |
| 51 | 3 | 3 | 3 | 3 | 3 | 3 | 53% | 3 | 3.7% |
| 52 | 3 | 5 | 5 | 4 | 2 | 1 | 53% | 3 | 1.2% |
| 53 | 3 | 4 | 4 | 1 | 5 | 2 | 55% | 3 | 5.5% |
| 54 | 3 | 2 | 2 | 5 | 1 | 4 | 78% | 3 | 2.4% |
| 55 | 3 | 1 | 1 | 2 | 4 | 5 | 75% | 3 | 0.8% |
| 56 | 5 | 3 | 5 | 5 | 5 | 5 | 90% | 3 | 1.4% |
| 57 | 5 | 5 | 4 | 2 | 1 | 3 | 59% | 3 | 1.5% |
| 58 | 5 | 4 | 2 | 3 | 4 | 1 | 34% | 3 | 3.7% |
| 59 | 5 | 2 | 1 | 4 | 3 | 2 | 34% | 3 | 6.7% |
| 60 | 5 | 1 | 3 | 1 | 2 | 4 | 77% | 3 | 2.5% |
| 61 | 4 | 3 | 4 | 4 | 4 | 4 | 83% | 3 | 1.9% |
| 62 | 4 | 5 | 2 | 1 | 3 | 5 | 77% | 3 | 1.0% |
| 63 | 4 | 4 | 1 | 5 | 2 | 3 | 13% | 3 | 7.4% |
| 64 | 4 | 2 | 3 | 2 | 5 | 1 | 45% | 3 | 4.3% |
| 65 | 4 | 1 | 5 | 3 | 1 | 2 | 78% | 3 | 0.3% |
| 66 | 2 | 3 | 2 | 2 | 2 | 2 | 13% | 3 | 1.6% |
| 67 | 2 | 5 | 1 | 3 | 5 | 4 | 39% | 3 | 2.6% |
| 68 | 2 | 4 | 3 | 4 | 1 | 5 | 81% | 3 | 1.6% |
| 69 | 2 | 2 | 5 | 1 | 4 | 3 | 55% | 3 | 2.3% |
| 70 | 2 | 1 | 4 | 5 | 3 | 1 | 54% | 3 | 3.5% |
| 71 | 1 | 3 | 1 | 1 | 1 | 1 | 3%  | 3 | 7.1% |
| 72 | 1 | 5 | 3 | 5 | 4 | 2 | 31% | 3 | 1.5% |
| 73 | 1 | 4 | 5 | 2 | 3 | 4 | 77% | 3 | 1.0% |
| 74 | 1 | 2 | 4 | 3 | 2 | 5 | 88% | 3 | 0.4% |
| 75 | 1 | 1 | 2 | 4 | 5 | 3 | 26% | 3 | 5.2% |
| SR |   |   |   |   |   |   | 95% | 3 | 0.2% |

Drug dose “1”, “2”, “3”, “4” and “5” represent 0%, 5%, 10%, 15% and 20% of the drug effect level, respectively. Data shown are mean % inhibition, number of replicates (N), and standard error (SE). SR, Standard Regimen tested at 20% of the drug effect level.
