# Supplementary material for: Artificial intelligence enabled parabolic response surface platform identifies ultra-rapid near-universal TB drug treatment regimens comprising approved drugs
Source: PubMed Central journal article supplement (PMC6510528; doi:10.1371/journal.pone.0215607), 2019-05-10
Supplement: pone.0215607.s006.pdf [file pone.0215607.s006.pdf]

**S6 Table. Iteration 3B, five-level orthogonal array central composite design and experimental results.**

|                                  |    |     |       |     |     |     | % Inhibition |    |      |
|----------------------------------|----|-----|-------|-----|-----|-----|--------------|----|------|
|                                  |    |     |       |     |     |     | Mean         | N  | SE   |
| Control 1 (no infection control) |    |     |       |     |     |     | 100%         | 4  | 0.1% |
| Control 2 (no IPTG control)      |    |     |       |     |     |     | 100%         | 4  | 0.1% |
| Control 3 (no drug control)      |    |     |       |     |     |     | 0%           | 27 | 1.0% |
| Control 4 (all drug control)     |    |     |       |     |     |     | 95%          | 2  | 0.3% |
| Run/Drug                         | AC | CFZ | SQ109 | RIF | BDQ | DLM |              |    |      |
| 1                                | 1  | 1   | 1     | 1   | 1   | 1   | -8%          | 3  | 1.7% |
| 2                                | 1  | 1   | 1     | 1   | 5   | 5   | 21%          | 3  | 0.9% |
| 3                                | 1  | 1   | 1     | 5   | 1   | 5   | 68%          | 3  | 2.5% |
| 4                                | 1  | 1   | 1     | 5   | 5   | 1   | 18%          | 3  | 3.0% |
| 5                                | 1  | 1   | 5     | 1   | 1   | 5   | 36%          | 3  | 1.9% |
| 6                                | 1  | 1   | 5     | 1   | 5   | 1   | 32%          | 3  | 2.9% |
| 7                                | 1  | 1   | 5     | 5   | 1   | 1   | 66%          | 3  | 3.3% |
| 8                                | 1  | 1   | 5     | 5   | 5   | 5   | 85%          | 3  | 2.4% |
| 9                                | 1  | 5   | 1     | 1   | 1   | 5   | 56%          | 3  | 1.9% |
| 10                               | 1  | 5   | 1     | 1   | 5   | 1   | 51%          | 3  | 0.8% |
| 11                               | 1  | 5   | 1     | 5   | 1   | 1   | 34%          | 3  | 2.5% |
| 12                               | 1  | 5   | 1     | 5   | 5   | 5   | 58%          | 3  | 4.0% |
| 13                               | 1  | 5   | 5     | 1   | 1   | 1   | 63%          | 3  | 3.3% |
| 14                               | 1  | 5   | 5     | 1   | 5   | 5   | 81%          | 3  | 0.5% |
| 15                               | 1  | 5   | 5     | 5   | 1   | 5   | 83%          | 3  | 3.2% |
| 16                               | 1  | 5   | 5     | 5   | 5   | 1   | 83%          | 3  | 2.2% |
| 17                               | 5  | 1   | 1     | 1   | 1   | 5   | 39%          | 3  | 5.5% |
| 18                               | 5  | 1   | 1     | 1   | 5   | 1   | 9%           | 3  | 5.3% |
| 19                               | 5  | 1   | 1     | 5   | 1   | 1   | 48%          | 3  | 2.1% |
| 20                               | 5  | 1   | 1     | 5   | 5   | 5   | 86%          | 3  | 0.3% |
| 21                               | 5  | 1   | 5     | 1   | 1   | 1   | 38%          | 3  | 3.2% |
| 22                               | 5  | 1   | 5     | 1   | 5   | 5   | 63%          | 3  | 2.8% |
| 23                               | 5  | 1   | 5     | 5   | 1   | 5   | 94%          | 3  | 0.6% |
| 24                               | 5  | 1   | 5     | 5   | 5   | 1   | 81%          | 3  | 0.6% |
| 25                               | 5  | 5   | 1     | 1   | 1   | 1   | 47%          | 3  | 1.1% |
| 26                               | 5  | 5   | 1     | 1   | 5   | 5   | 70%          | 3  | 2.2% |
| 27                               | 5  | 5   | 1     | 5   | 1   | 5   | 67%          | 3  | 2.4% |
| 28                               | 5  | 5   | 1     | 5   | 5   | 1   | 52%          | 3  | 1.9% |
| 29                               | 5  | 5   | 5     | 1   | 1   | 5   | 89%          | 3  | 0.3% |
| 30                               | 5  | 5   | 5     | 1   | 5   | 1   | 76%          | 3  | 1.0% |
| 31                               | 5  | 5   | 5     | 5   | 1   | 1   | 87%          | 3  | 2.4% |
| 32                               | 5  | 5   | 5     | 5   | 5   | 5   | 95%          | 3  | 0.8% |
| 33                               | 1  | 1   | 1     | 1   | 1   | 1   | -15%         | 3  | 3.6% |
| 34                               | 1  | 3   | 3     | 3   | 3   | 3   | 53%          | 3  | 4.4% |
| 35                               | 1  | 5   | 5     | 5   | 5   | 5   | 93%          | 3  | 0.5% |
| 36                               | 3  | 1   | 1     | 3   | 3   | 5   | 90%          | 3  | 1.5% |
| 37                               | 3  | 3   | 3     | 5   | 5   | 1   | 64%          | 3  | 1.9% |
| 38                               | 3  | 5   | 5     | 1   | 1   | 3   | 81%          | 3  | 2.2% |
| 39                               | 5  | 1   | 3     | 1   | 5   | 3   | 36%          | 3  | 2.4% |
| 40                               | 5  | 3   | 5     | 3   | 1   | 5   | 90%          | 3  | 1.1% |
| 41                               | 5  | 5   | 1     | 5   | 3   | 1   | 55%          | 3  | 8.2% |
| 42                               | 1  | 1   | 5     | 5   | 3   | 3   | 50%          | 3  | 5.5% |
| 43                               | 1  | 3   | 1     | 1   | 5   | 5   | 62%          | 3  | 3.0% |

|    |   |   |   |   |   |   |     |   |      |
|----|---|---|---|---|---|---|-----|---|------|
| 44 | 1 | 5 | 3 | 3 | 1 | 1 | 58% | 3 | 3.4% |
| 45 | 3 | 1 | 3 | 5 | 1 | 5 | 94% | 3 | 0.3% |
| 46 | 3 | 3 | 5 | 1 | 3 | 1 | 61% | 3 | 2.4% |
| 47 | 3 | 5 | 1 | 3 | 5 | 3 | 47% | 3 | 5.2% |
| 48 | 5 | 1 | 5 | 3 | 5 | 1 | 77% | 3 | 2.0% |
| 49 | 5 | 3 | 1 | 5 | 1 | 3 | 54% | 3 | 7.8% |
| 50 | 5 | 5 | 3 | 1 | 3 | 5 | 86% | 3 | 0.6% |
| 51 | 3 | 3 | 3 | 3 | 3 | 3 | 56% | 3 | 0.5% |
| 52 | 3 | 5 | 5 | 4 | 2 | 1 | 70% | 3 | 3.3% |
| 53 | 3 | 4 | 4 | 1 | 5 | 2 | 71% | 3 | 2.0% |
| 54 | 3 | 2 | 2 | 5 | 1 | 4 | 75% | 3 | 2.8% |
| 55 | 3 | 1 | 1 | 2 | 4 | 5 | 84% | 3 | 0.8% |
| 56 | 5 | 3 | 5 | 5 | 5 | 5 | 95% | 3 | 0.6% |
| 57 | 5 | 5 | 4 | 2 | 1 | 3 | 73% | 3 | 0.6% |
| 58 | 5 | 4 | 2 | 3 | 4 | 1 | 49% | 3 | 3.0% |
| 59 | 5 | 2 | 1 | 4 | 3 | 2 | 44% | 3 | 1.5% |
| 60 | 5 | 1 | 3 | 1 | 2 | 4 | 57% | 3 | 2.0% |
| 61 | 4 | 3 | 4 | 4 | 4 | 4 | 87% | 3 | 2.2% |
| 62 | 4 | 5 | 2 | 1 | 3 | 5 | 83% | 3 | 0.3% |
| 63 | 4 | 4 | 1 | 5 | 2 | 3 | 50% | 3 | 3.8% |
| 64 | 4 | 2 | 3 | 2 | 5 | 1 | 62% | 3 | 5.2% |
| 65 | 4 | 1 | 5 | 3 | 1 | 2 | 80% | 3 | 2.6% |
| 66 | 2 | 3 | 2 | 2 | 2 | 2 | 20% | 3 | 5.9% |
| 67 | 2 | 5 | 1 | 3 | 5 | 4 | 58% | 3 | 2.1% |
| 68 | 2 | 4 | 3 | 4 | 1 | 5 | 86% | 3 | 0.8% |
| 69 | 2 | 2 | 5 | 1 | 4 | 3 | 68% | 3 | 3.2% |
| 70 | 2 | 1 | 4 | 5 | 3 | 1 | 78% | 3 | 1.5% |
| 71 | 1 | 3 | 1 | 1 | 1 | 1 | 33% | 3 | 4.9% |
| 72 | 1 | 5 | 3 | 5 | 4 | 2 | 70% | 3 | 2.5% |
| 73 | 1 | 4 | 5 | 2 | 3 | 4 | 79% | 3 | 2.2% |
| 74 | 1 | 2 | 4 | 3 | 2 | 5 | 85% | 3 | 1.2% |
| 75 | 1 | 1 | 2 | 4 | 5 | 3 | 39% | 3 | 2.9% |
| SR |   |   |   |   |   |   | 99% | 3 | 0.1% |

Drug dose “1”, “2”, “3”, “4” and “5” represent 0%, 5%, 10%, 15% and 20% of the drug effect level, respectively. Data shown are mean % inhibition, number of replicates (N), and standard error (SE). SR, Standard Regimen tested at 20% of the drug effect level.
