# Supplementary material for: Artificial intelligence enabled parabolic response surface platform identifies ultra-rapid near-universal TB drug treatment regimens comprising approved drugs
Source: PubMed Central journal article supplement (PMC6510528; doi:10.1371/journal.pone.0215607), 2019-05-10
Supplement: pone.0215607.s007.pdf [file pone.0215607.s007.pdf]

**S7 Table. Iteration 3C, three-level orthogonal array central composite design and experimental results.**

|                                                         |    |     |       |     |       |     |     | % Inhibition |    |      |
|---------------------------------------------------------|----|-----|-------|-----|-------|-----|-----|--------------|----|------|
|                                                         |    |     |       |     |       |     |     | Mean         | N  | SE   |
| Control 1 (no infection control)                        |    |     |       |     |       |     |     | 95%          | 4  | 0.4% |
| Control 2 (no IPTG control)                             |    |     |       |     |       |     |     | 92%          | 4  | 0.4% |
| Control 3 (no drug control)                             |    |     |       |     |       |     |     | 0%           | 26 | 1.2% |
| Control 4 (all drug control, at 7.5% drug effect level) |    |     |       |     |       |     |     | 42%          | 2  | 2.7% |
| Run/Drug                                                | AC | CFZ | PA824 | RIF | SQ109 | BDQ | DLM |              |    |      |
| 1                                                       | 1  | 1   | 1     | 1   | 1     | 1   | 3   | 19%          | 3  | 3.8% |
| 2                                                       | 1  | 1   | 1     | 1   | 1     | 3   | 1   | 33%          | 3  | 2.0% |
| 3                                                       | 1  | 1   | 1     | 1   | 3     | 1   | 1   | 25%          | 3  | 3.9% |
| 4                                                       | 1  | 1   | 1     | 1   | 3     | 3   | 3   | 54%          | 3  | 1.3% |
| 5                                                       | 1  | 1   | 1     | 3   | 1     | 1   | 1   | 26%          | 3  | 4.8% |
| 6                                                       | 1  | 1   | 1     | 3   | 1     | 3   | 3   | 61%          | 3  | 2.6% |
| 7                                                       | 1  | 1   | 1     | 3   | 3     | 1   | 3   | 77%          | 3  | 1.9% |
| 8                                                       | 1  | 1   | 1     | 3   | 3     | 3   | 1   | 63%          | 3  | 1.5% |
| 9                                                       | 1  | 1   | 3     | 1   | 1     | 1   | 1   | 21%          | 3  | 2.3% |
| 10                                                      | 1  | 1   | 3     | 1   | 1     | 3   | 3   | 54%          | 3  | 4.3% |
| 11                                                      | 1  | 1   | 3     | 1   | 3     | 1   | 3   | 65%          | 3  | 1.6% |
| 12                                                      | 1  | 1   | 3     | 1   | 3     | 3   | 1   | 69%          | 3  | 1.4% |
| 13                                                      | 1  | 1   | 3     | 3   | 1     | 1   | 3   | 71%          | 3  | 2.9% |
| 14                                                      | 1  | 1   | 3     | 3   | 1     | 3   | 1   | 43%          | 3  | 1.8% |
| 15                                                      | 1  | 1   | 3     | 3   | 3     | 1   | 1   | 80%          | 3  | 1.3% |
| 16                                                      | 1  | 1   | 3     | 3   | 3     | 3   | 3   | 77%          | 3  | 1.3% |
| 17                                                      | 1  | 3   | 1     | 1   | 1     | 1   | 1   | 11%          | 3  | 6.5% |
| 18                                                      | 1  | 3   | 1     | 1   | 1     | 3   | 3   | 51%          | 3  | 3.4% |
| 19                                                      | 1  | 3   | 1     | 1   | 3     | 1   | 3   | 51%          | 3  | 2.1% |
| 20                                                      | 1  | 3   | 1     | 1   | 3     | 3   | 1   | 62%          | 3  | 4.1% |
| 21                                                      | 1  | 3   | 1     | 3   | 1     | 1   | 3   | 54%          | 3  | 3.6% |
| 22                                                      | 1  | 3   | 1     | 3   | 1     | 3   | 1   | 33%          | 3  | 3.3% |
| 23                                                      | 1  | 3   | 1     | 3   | 3     | 1   | 1   | 68%          | 3  | 0.8% |
| 24                                                      | 1  | 3   | 1     | 3   | 3     | 3   | 3   | 78%          | 3  | 0.2% |
| 25                                                      | 1  | 3   | 3     | 1   | 1     | 1   | 3   | 49%          | 3  | 2.9% |
| 26                                                      | 1  | 3   | 3     | 1   | 1     | 3   | 1   | 52%          | 3  | 2.0% |
| 27                                                      | 1  | 3   | 3     | 1   | 3     | 1   | 1   | 45%          | 3  | 4.6% |
| 28                                                      | 1  | 3   | 3     | 1   | 3     | 3   | 3   | 79%          | 3  | 0.6% |
| 29                                                      | 1  | 3   | 3     | 3   | 1     | 1   | 1   | 37%          | 3  | 3.1% |
| 30                                                      | 1  | 3   | 3     | 3   | 1     | 3   | 3   | 66%          | 3  | 1.1% |
| 31                                                      | 1  | 3   | 3     | 3   | 3     | 1   | 3   | 79%          | 3  | 0.5% |
| 32                                                      | 1  | 3   | 3     | 3   | 3     | 3   | 1   | 77%          | 3  | 1.5% |
| 33                                                      | 3  | 1   | 1     | 1   | 1     | 1   | 1   | 25%          | 3  | 4.8% |
| 34                                                      | 3  | 1   | 1     | 1   | 1     | 3   | 3   | 57%          | 3  | 2.1% |
| 35                                                      | 3  | 1   | 1     | 1   | 3     | 1   | 3   | 64%          | 3  | 1.4% |
| 36                                                      | 3  | 1   | 1     | 1   | 3     | 3   | 1   | 78%          | 3  | 1.1% |
| 37                                                      | 3  | 1   | 1     | 3   | 1     | 1   | 3   | 77%          | 3  | 1.6% |
| 38                                                      | 3  | 1   | 1     | 3   | 1     | 3   | 1   | 56%          | 3  | 1.0% |
| 39                                                      | 3  | 1   | 1     | 3   | 3     | 1   | 1   | 84%          | 3  | 0.8% |
| 40                                                      | 3  | 1   | 1     | 3   | 3     | 3   | 3   | 83%          | 3  | 0.3% |
| 41                                                      | 3  | 1   | 3     | 1   | 1     | 1   | 3   | 59%          | 3  | 2.0% |
| 42                                                      | 3  | 1   | 3     | 1   | 1     | 3   | 1   | 56%          | 3  | 3.0% |
| 43                                                      | 3  | 1   | 3     | 1   | 3     | 1   | 1   | 62%          | 3  | 1.0% |

|        |   |   |   |   |   |   |   |     |   |      |
|--------|---|---|---|---|---|---|---|-----|---|------|
| 44     | 3 | 1 | 3 | 1 | 3 | 3 | 3 | 76% | 3 | 1.5% |
| 45     | 3 | 1 | 3 | 3 | 1 | 1 | 1 | 55% | 3 | 2.6% |
| 46     | 3 | 1 | 3 | 3 | 1 | 3 | 3 | 77% | 3 | 1.0% |
| 47     | 3 | 1 | 3 | 3 | 3 | 1 | 3 | 84% | 3 | 1.2% |
| 48     | 3 | 1 | 3 | 3 | 3 | 3 | 1 | 72% | 3 | 1.0% |
| 49     | 3 | 3 | 1 | 1 | 1 | 1 | 3 | 56% | 3 | 2.8% |
| 50     | 3 | 3 | 1 | 1 | 1 | 3 | 1 | 49% | 3 | 1.6% |
| 51     | 3 | 3 | 1 | 1 | 3 | 1 | 1 | 51% | 3 | 1.7% |
| 52     | 3 | 3 | 1 | 1 | 3 | 3 | 3 | 68% | 3 | 1.6% |
| 53     | 3 | 3 | 1 | 3 | 1 | 1 | 1 | 38% | 3 | 2.7% |
| 54     | 3 | 3 | 1 | 3 | 1 | 3 | 3 | 62% | 3 | 0.6% |
| 55     | 3 | 3 | 1 | 3 | 3 | 1 | 3 | 75% | 3 | 0.3% |
| 56     | 3 | 3 | 1 | 3 | 3 | 3 | 1 | 69% | 3 | 1.0% |
| 57     | 3 | 3 | 3 | 1 | 1 | 1 | 1 | 44% | 3 | 3.9% |
| 58     | 3 | 3 | 3 | 1 | 1 | 3 | 3 | 65% | 3 | 1.2% |
| 59     | 3 | 3 | 3 | 1 | 3 | 1 | 3 | 68% | 3 | 1.2% |
| 60     | 3 | 3 | 3 | 1 | 3 | 3 | 1 | 70% | 3 | 0.7% |
| 61     | 3 | 3 | 3 | 3 | 1 | 1 | 3 | 76% | 3 | 0.9% |
| 62     | 3 | 3 | 3 | 3 | 1 | 3 | 1 | 45% | 3 | 4.3% |
| 63     | 3 | 3 | 3 | 3 | 3 | 1 | 1 | 74% | 3 | 1.3% |
| 64     | 3 | 3 | 3 | 3 | 3 | 3 | 3 | 74% | 3 | 1.1% |
| 65     | 1 | 1 | 1 | 1 | 1 | 1 | 1 | 6%  | 3 | 8.0% |
| 66     | 1 | 2 | 2 | 2 | 2 | 2 | 2 | 36% | 3 | 2.1% |
| 67     | 1 | 3 | 3 | 3 | 3 | 3 | 3 | 70% | 3 | 1.9% |
| 68     | 2 | 1 | 1 | 2 | 2 | 3 | 3 | 48% | 3 | 2.8% |
| 69     | 2 | 2 | 2 | 3 | 3 | 1 | 1 | 66% | 3 | 0.2% |
| 70     | 2 | 3 | 3 | 1 | 1 | 2 | 2 | 49% | 3 | 1.5% |
| 71     | 3 | 1 | 2 | 1 | 3 | 2 | 3 | 66% | 3 | 1.2% |
| 72     | 3 | 2 | 3 | 2 | 1 | 3 | 1 | 46% | 3 | 3.1% |
| 73     | 3 | 3 | 1 | 3 | 2 | 1 | 2 | 58% | 3 | 0.7% |
| 74     | 1 | 1 | 3 | 3 | 2 | 2 | 1 | 37% | 3 | 3.0% |
| 75     | 1 | 2 | 1 | 1 | 3 | 3 | 2 | 58% | 3 | 3.5% |
| 76     | 1 | 3 | 2 | 2 | 1 | 1 | 3 | 50% | 3 | 1.3% |
| 77     | 2 | 1 | 2 | 3 | 1 | 3 | 2 | 54% | 3 | 1.8% |
| 78     | 2 | 2 | 3 | 1 | 2 | 1 | 3 | 61% | 3 | 1.3% |
| 79     | 2 | 3 | 1 | 2 | 3 | 2 | 1 | 41% | 3 | 1.8% |
| 80     | 3 | 1 | 3 | 2 | 3 | 1 | 2 | 67% | 3 | 0.7% |
| 81     | 3 | 2 | 1 | 3 | 1 | 2 | 3 | 76% | 3 | 1.0% |
| 82     | 3 | 3 | 2 | 1 | 2 | 3 | 1 | 56% | 3 | 1.4% |
| SR (H) |   |   |   |   |   |   |   | 91% | 3 | 0.6% |
| SR (M) |   |   |   |   |   |   |   | 57% | 3 | 0.5% |

Drug dose “1”, “2” and “3” represent 0%, 7.5% and 15% of the drug effect level, respectively. Data shown are mean % inhibition, number of replicates (N), and standard error (SE). SR (H), Standard Regimen tested at 15% of the drug effect level. SR (M), Standard Regimen tested at 7.5% of the drug effect level.
