# Supplementary material for: Artificial intelligence enabled parabolic response surface platform identifies ultra-rapid near-universal TB drug treatment regimens comprising approved drugs
Source: PubMed Central journal article supplement (PMC6510528; doi:10.1371/journal.pone.0215607), 2019-05-10
Supplement: pone.0215607.s008.pdf [file pone.0215607.s008.pdf]

**S8 Table. *In vivo* treatment efficacy of the 14 top 4-drug experimental regimens identified from studies in *M. tuberculosis* infected THP-1 macrophages using the PRS platform.**

| Group | Treatment <sup>a</sup><br>Drug combination (mg/kg)                       | Lung burden in mouse (log <sub>10</sub> CFU) |       |       |       |       | Mean ± SE   |
|-------|--------------------------------------------------------------------------|----------------------------------------------|-------|-------|-------|-------|-------------|
|       |                                                                          | 1                                            | 2     | 3     | 4     | 5     |             |
| A     | Sham                                                                     | 7.59                                         | 7.33  | 7.61  | 7.63  | 7.65  | 7.56 ± 0.06 |
| B     | Standard Regimen <sup>b</sup><br>INH,RIF,EMB,PZA (25,10,100,150)         | 4.69                                         | 4.78  | 4.78  | 4.79  | 4.36  | 4.68 ± 0.08 |
| C     | PRS Regimen II<br>CFZ,BDQ,PZA,EMB (25,30,450,100)                        | 0.78                                         | 0.78  | 0.00  | 0.95  | 0.60  | 0.62 ± 0.17 |
| D     | Experimental Regimen <sup>c</sup><br>RPT,AC,DLM,SQ109 (10,200-50,2.5,25) | 3.78                                         | 3.61  | 3.77  | 3.83  | 3.79  | 3.76 ± 0.04 |
| E     | Experimental Regimen<br>RPT,AC,DLM,PA824 (10,200-50,2.5,100)             | ≥5.00                                        | ≥5.00 | ≥5.00 | ≥5.00 | ≥5.00 |             |
| F     | Experimental Regimen<br>RPT,AC,PA824,SQ109 (10,200-50,100,25)            | ≥5.00                                        | ≥5.00 | ≥5.00 | ≥5.00 | ≥5.00 |             |
| G     | Experimental Regimen<br>RPT,AC,BDQ,SQ109 (10,200-50,30,25)               | 3.06                                         | 3.01  | 2.60  | 2.76  | 2.89  | 2.86 ± 0.08 |
| H     | Experimental Regimen<br>RPT,AC,CFZ,DLM (10,200-50,25,2.5)                | 2.65                                         | 3.33  | 3.31  | 2.99  | 3.28  | 3.11 ± 0.13 |
| I     | Experimental Regimen<br>RPT,AC,BDQ,DLM (10,200-50,30,2.5)                | 2.95                                         | 3.17  | 2.77  | 2.64  | 3.20  | 2.95 ± 0.11 |
| J     | Experimental Regimen<br>RPT,AC,BDQ,CFZ (10,200-50,30,25)                 | 1.56                                         | 2.10  | 2.27  | 1.87  | 1.74  | 1.91 ± 0.13 |
| K     | Experimental Regimen<br>RPT,DLM,PA824,SQ109 (10,2.5,100,25)              | ≥5.00                                        | ≥5.00 | ≥5.00 | ≥5.00 | ≥5.00 |             |
| L     | Experimental Regimen<br>CFZ,AC,BDQ,DLM (25,200-50,30,2.5)                | 1.40                                         | 1.72  | 1.20  | 1.78  | 1.91  | 1.60 ± 0.13 |
| M     | Experimental Regimen<br>CFZ,AC,BDQ,PZA (25,200-50,30,450)                | 0.48                                         | 1.08  | 0.60  | 0.85  | 0.30  | 0.66 ± 0.14 |
| N     | Experimental Regimen<br>CFZ,AC,DLM,PA824 (25,200-50,2.5,100)             | ≥5.00                                        | ≥5.00 | ≥5.00 | ≥5.00 | ≥5.00 |             |
| O     | Experimental Regimen<br>CFZ,BDQ,PA824,SQ109 (25,30,100,25)               | 3.24                                         | 3.15  | 3.40  | 3.28  | 3.24  | 3.26 ± 0.04 |
| P     | Experimental Regimen<br>CFZ,BDQ,DLM,PZA (25,30,2.5,450)                  | 0.74                                         | 1.26  | 1.23  | 0.70  | 0.90  | 0.97 ± 0.12 |
| Q     | Experimental Regimen<br>CFZ,BDQ,DLM,PA824 (25,30,2.5,100)                | 3.34                                         | 3.12  | 3.23  | 3.19  | 3.48  | 3.27 ± 0.06 |

<sup>a</sup>BALB/c mice (17 groups, 5 mice/group) were infected with 2.5 log<sub>10</sub> CFU of *M. tuberculosis* Erdman by aerosol. Two weeks later, the number of bacteria in the lung increased to 6.01 logs at which time the treatment were initiated. The mice received sham treatment or treatment with the Standard Regimen, PRS Regimen II, or one of the fourteen top 4-drug experimental regimens by oral gavage 5 days per week (Monday-Friday) for 3 weeks. Three days after the last treatment, mice were euthanized to determine the lung burden of *M. tuberculosis*.

<sup>b</sup>RIF in the Standard Regimen represents rifampicin.

<sup>c</sup>RPT in all experimental regimens represents rifapentine.
