# Supplementary material for: Artificial intelligence enabled parabolic response surface platform identifies ultra-rapid near-universal TB drug treatment regimens comprising approved drugs
Source: PubMed Central journal article supplement (PMC6510528; doi:10.1371/journal.pone.0215607), 2019-05-10
Supplement: pone.0215607.s011.pdf [file pone.0215607.s011.pdf]

**S11 Table. Mouse lung burden of *M. tuberculosis* in relapse study.**

(A) Total lung CFU in mice 3 months after completion of 6 weeks treatment with the Standard Regimen comprising INH, RIF, EMB and PZA.

| Mouse | Total lung CFU |
|-------|----------------|
|       | 6 weeks        |
| 1     | ≥40,000        |
| 2     | 646            |
| 3     | 16,000         |
| 4     | 678            |
| 5     | 832            |
| 6     | 32,000         |
| 7     | 1,047          |
| 8     | 822            |
| 9     | 887            |
| 10    | 1,014          |

(B) Total lung CFU in mice 3 months after completion of 3, 4, and 5 weeks treatment with PRS Regimen III comprising CFZ, BDQ, PZA and SQ109 at 25, 30, 450 and 25 mg/kg.

| Mouse | Total lung CFU |         |         |
|-------|----------------|---------|---------|
|       | 3 weeks        | 4 weeks | 5 weeks |
| 1     | 0              | 0       | 0       |
| 2     | 0              | 0       | 0       |
| 3     | 0              | 0       | 0       |
| 4     | 0              | 0       | 0       |
| 5     | 0              | 0       | 0       |
| 6     | 0              | 0       | 0       |
| 7     | 0              | 0       | 0       |
| 8     | 0              | 0       | 0       |
| 9     | 0              | 0       | 0       |
| 10    | 0              | 0       | 0       |

(C) Total lung CFU in mice 3 months after completion of 3, 4, 5, and 6 weeks treatment with PRS Regimen IV comprising CFZ, BDQ, PZA and AC at 25, 37, 50 and 66.7-16.7 mg/kg.

| Mouse | Total lung CFU |         |              |         |
|-------|----------------|---------|--------------|---------|
|       | 3 weeks        | 4 weeks | 5 weeks      | 6 weeks |
| 1     | 0              | 1       | 0            | 0       |
| 2     | 97             | 0       | 0            | 0       |
| 3     | 0              | 0       | contaminated | 0       |
| 4     | 0              | 0       | 0            | 0       |
| 5     | contaminated   | 0       | 0            | 0       |
| 6     | 10             | 0       | 0            | 0       |
| 7     | 0              | 0       | 0            | 0       |
| 8     | 0              | 0       | 0            | 0       |
| 9     | 0              | 0       | 0            | 0       |
| 10    | 0              | 0       | 0            | 0       |

(D) Total lung CFU in mice 3 months after completion of 3, 4, 5, and 6 weeks treatment with PRS Regimen V comprising CFZ, BDQ, PZA and DLM at 25, 40, 185 and 0.83 mg/kg.

| Mouse | Total lung CFU |         |         |         |
|-------|----------------|---------|---------|---------|
|       | 3 weeks        | 4 weeks | 5 weeks | 6 weeks |
| 1     | 0              | 0       | 0       | 0       |
| 2     | 0              | 0       | 0       | 0       |
| 3     | 0              | 0       | 0       | 0       |
| 4     | 0              | 0       | 0       | 0       |
| 5     | 0              | 0       | 0       | 0       |
| 6     | 0              | 0       | 0       | 0       |
| 7     | 0              | 0       | 0       | 0       |
| 8     | 0              | 0       | 0       | 0       |
| 9     | 0              | 0       | 0       | 0       |
| 10    | 0              | 0       | 0       | 0       |

(E) Total lung CFU in mice 3 months after completion of 3, 4, 5, and 6 weeks treatment with PRS Regimen VI comprising CFZ, BDQ and PZA at 25, 40 and 185 mg/kg

| Mouse | Total lung CFU |         |         |         |
|-------|----------------|---------|---------|---------|
|       | 3 weeks        | 4 weeks | 5 weeks | 6 weeks |
| 1     | 0              | 0       | 0       | 0       |
| 2     | 0              | 0       | 0       | 0       |
| 3     | 0              | 0       | 0       | 0       |
| 4     | 0              | 0       | 0       | 0       |
| 5     | 0              | 0       | 0       | 0       |
| 6     | 0              | 0       | 0       | 0       |
| 7     | 0              | 0       | 0       | 0       |
| 8     | 0              | 0       | 0       | 0       |
| 9     | 0              | 0       | 0       | 0       |
| 10    | 0              | 0       | 0       | 0       |
